# Supplementary figures and images for: A combinatorial approach to synthetic transcription factor‐promoter combinations for yeast strain engineering
Source: PubMed Central journal article supplement — Yeast. 2017 Dec 7;35(3):273–80. doi: 10.1002/yea.3292 (PMC5873372; doi:10.1002/yea.3292), 2017-12-07

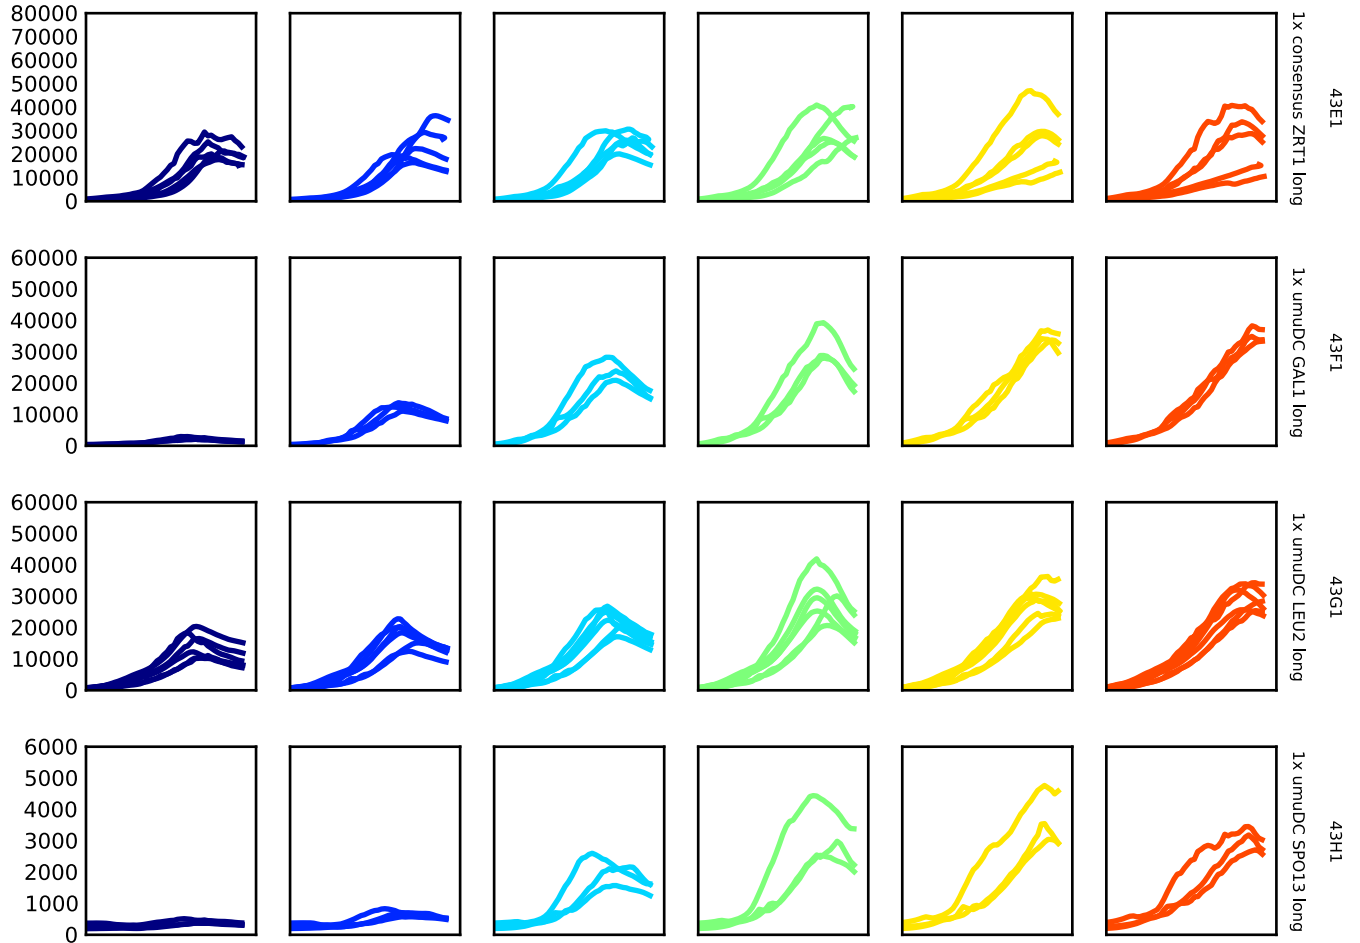

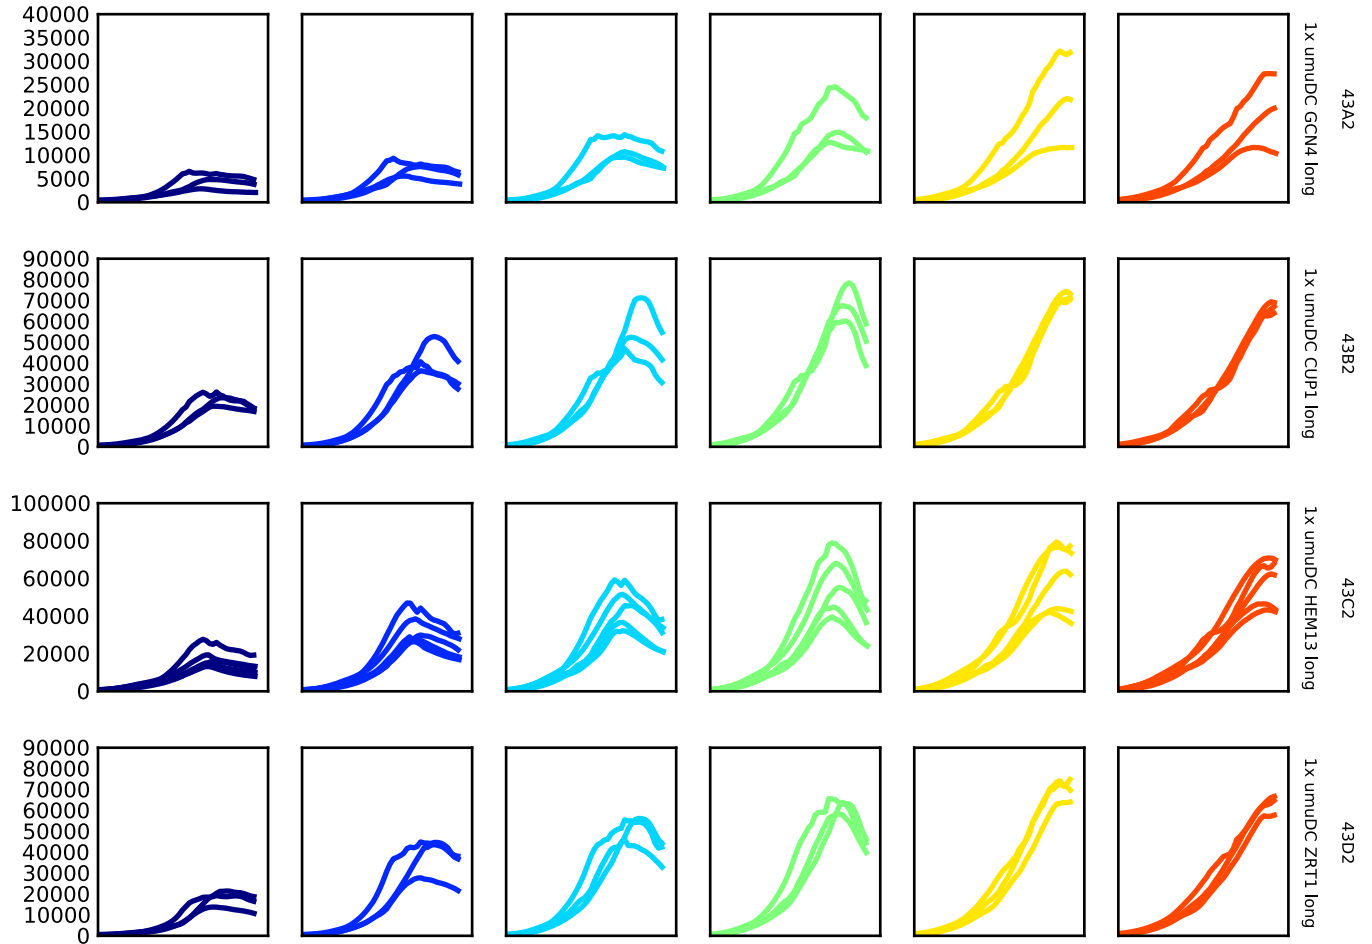

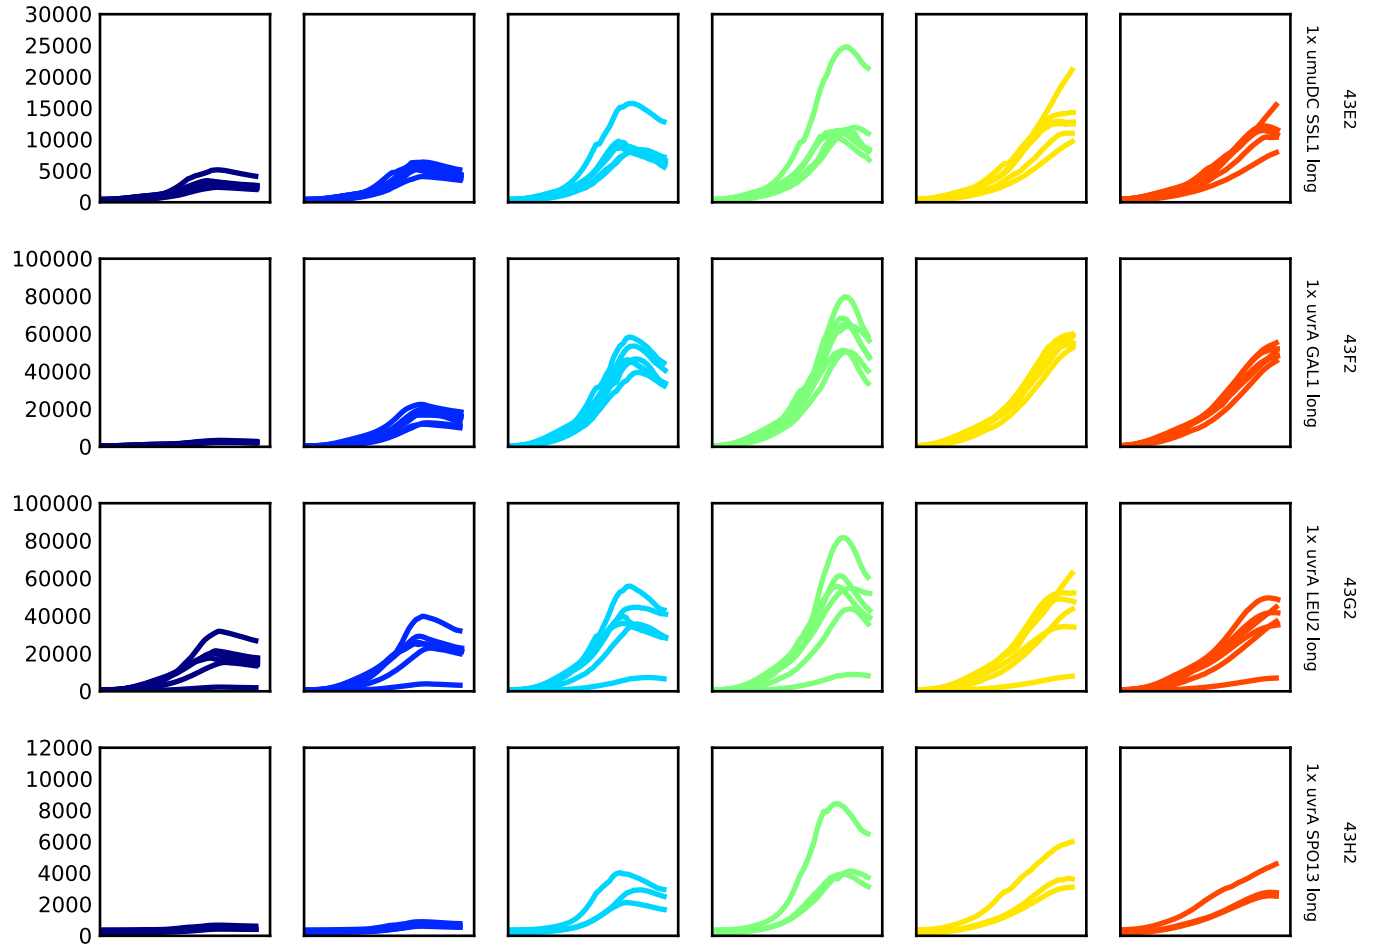

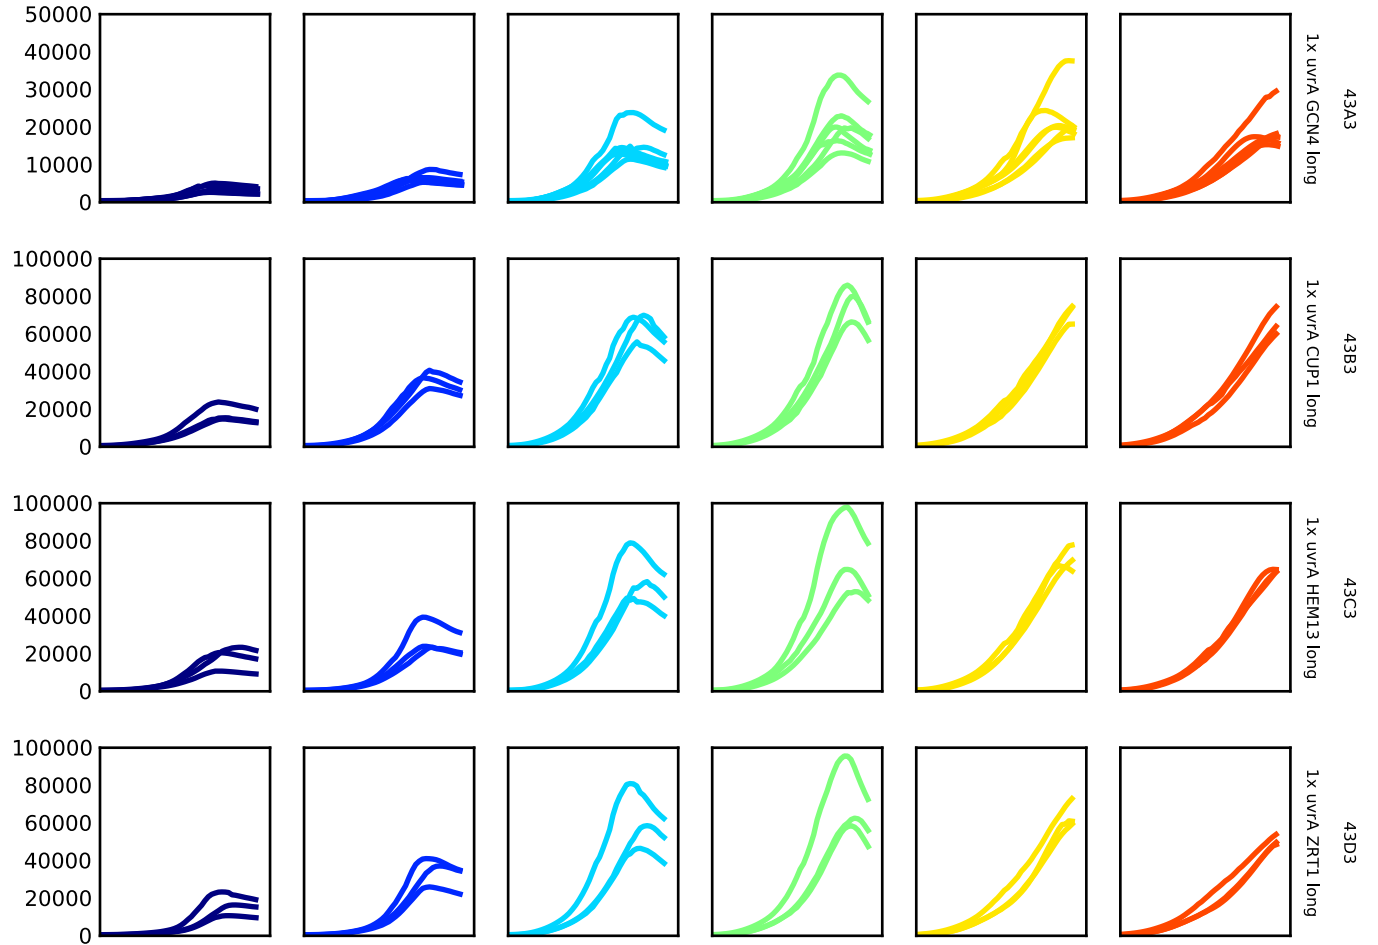

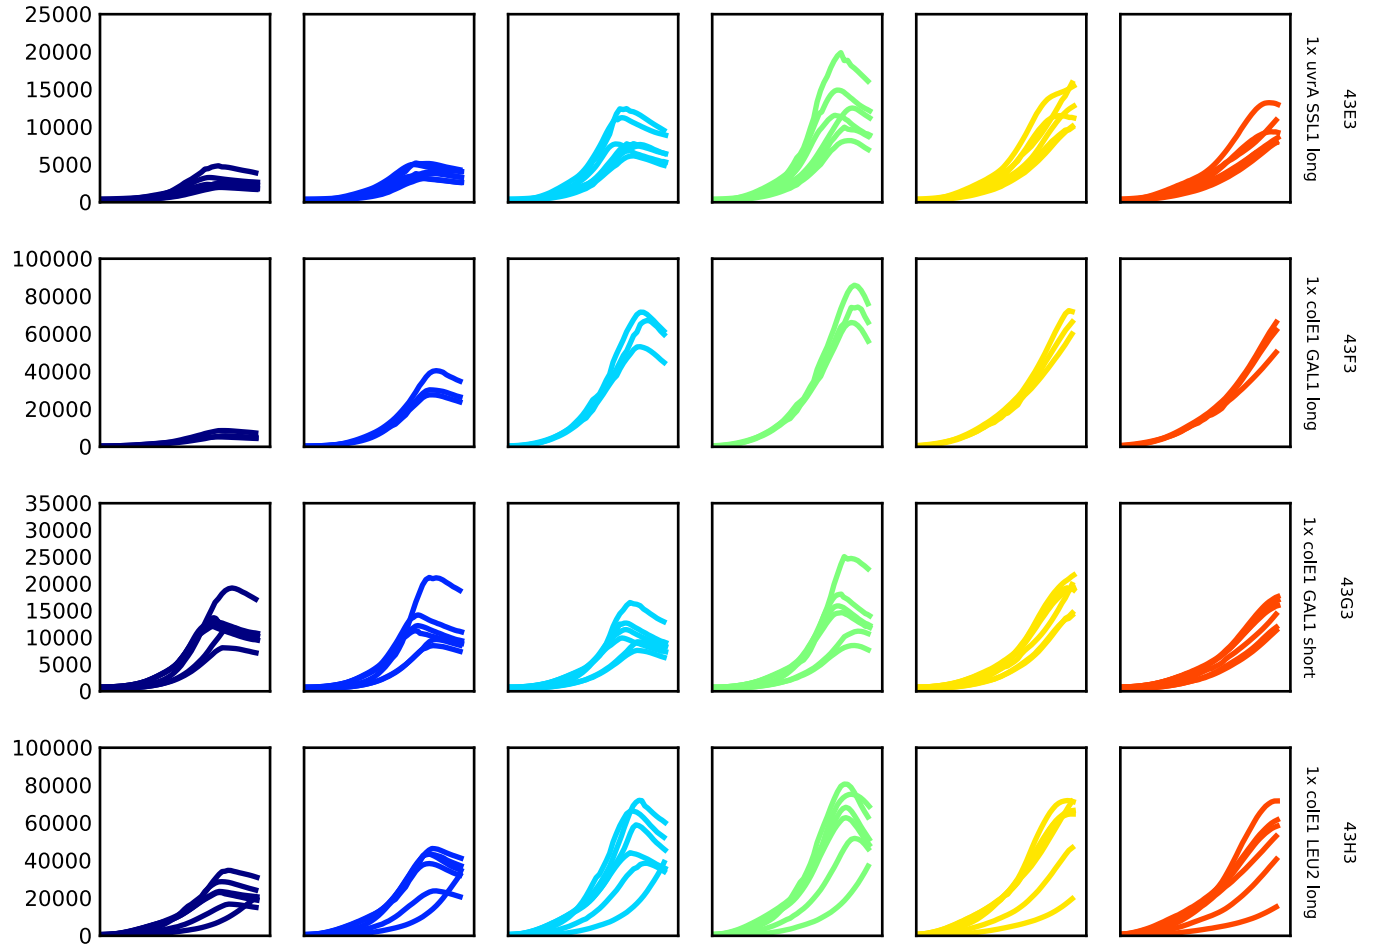

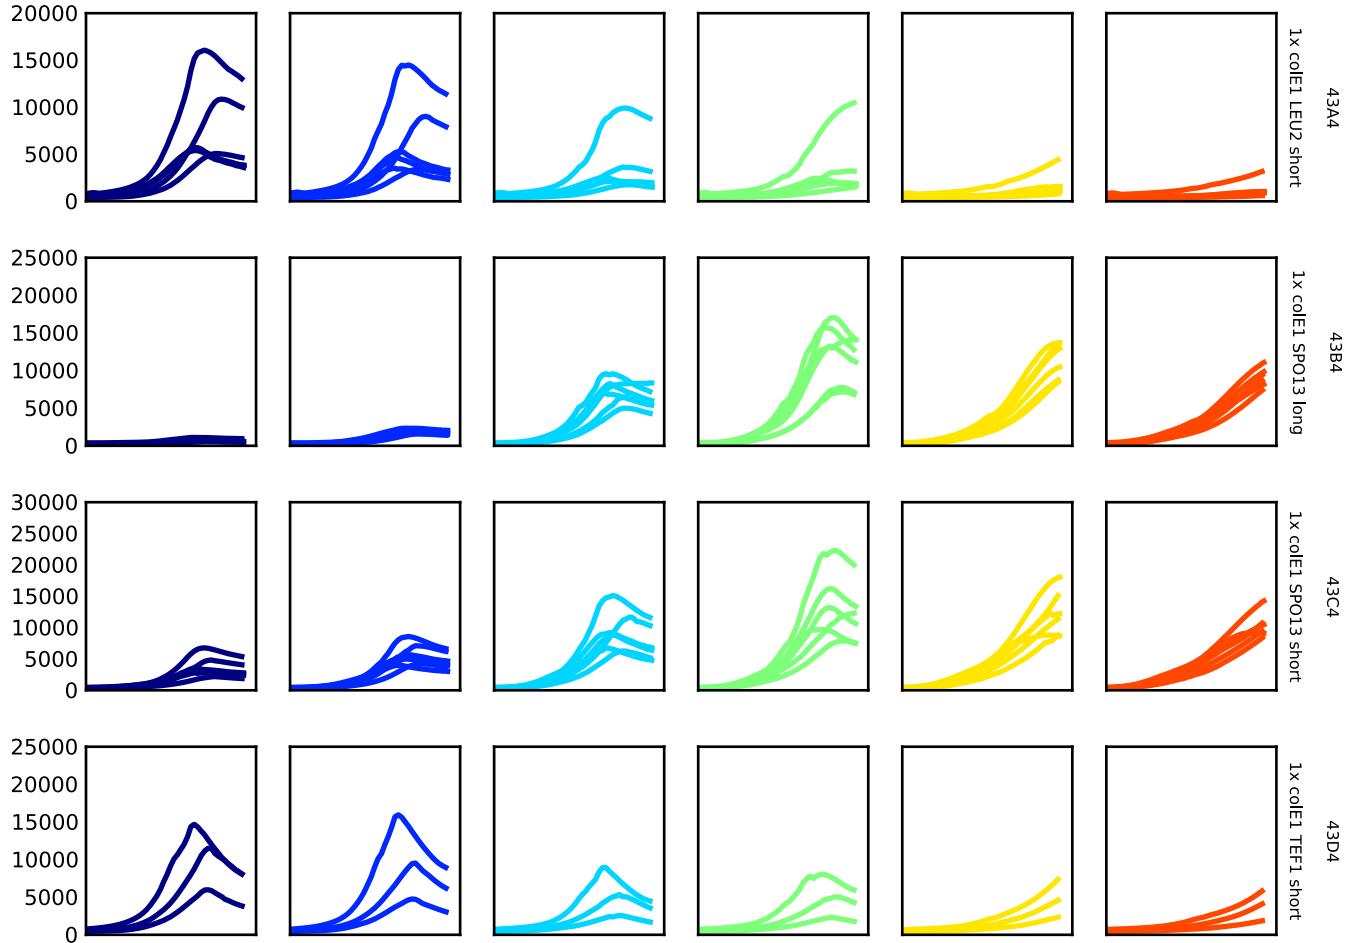

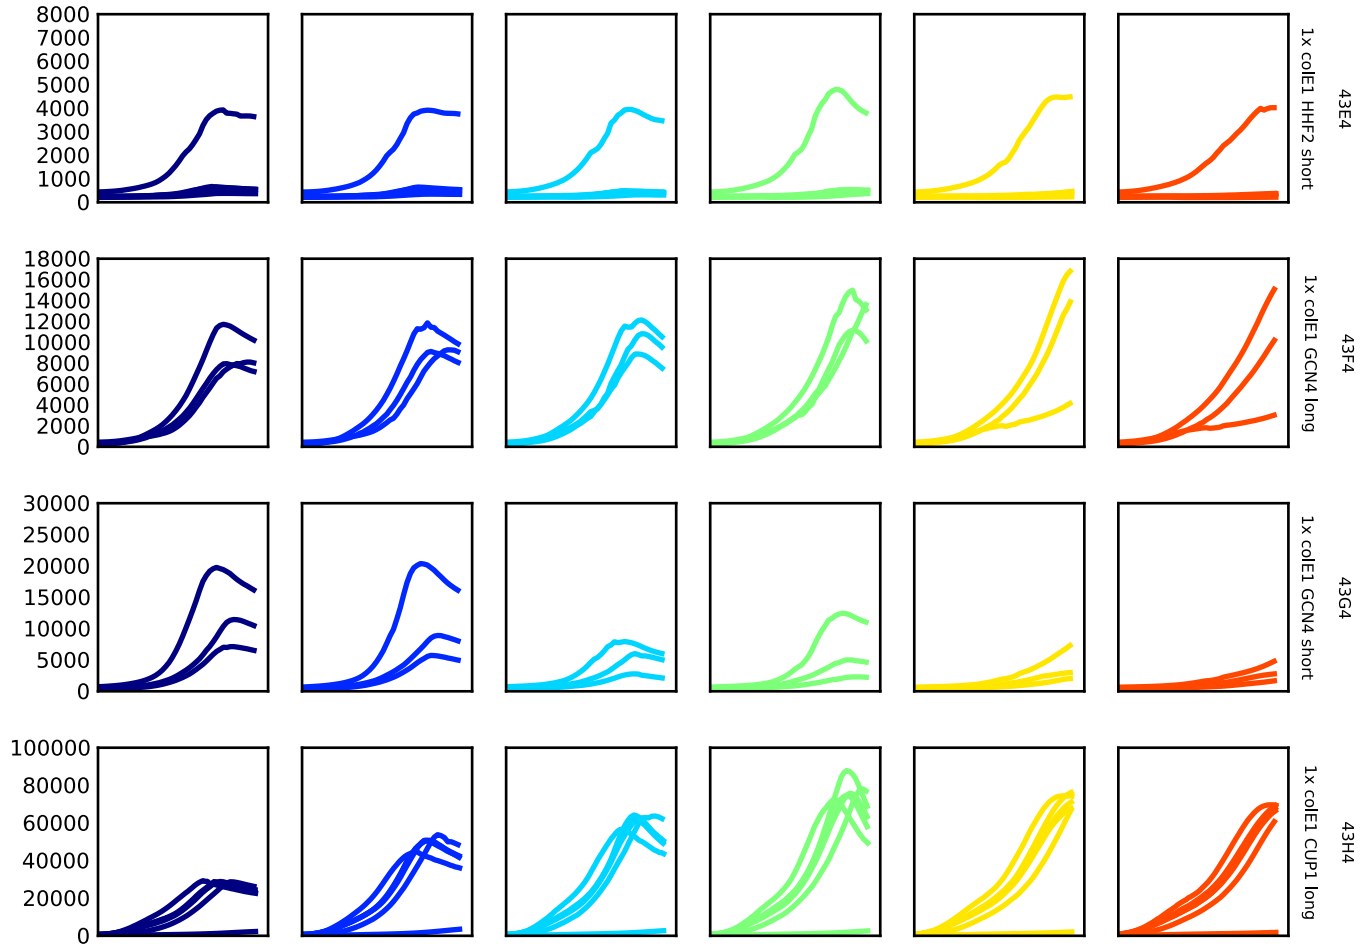



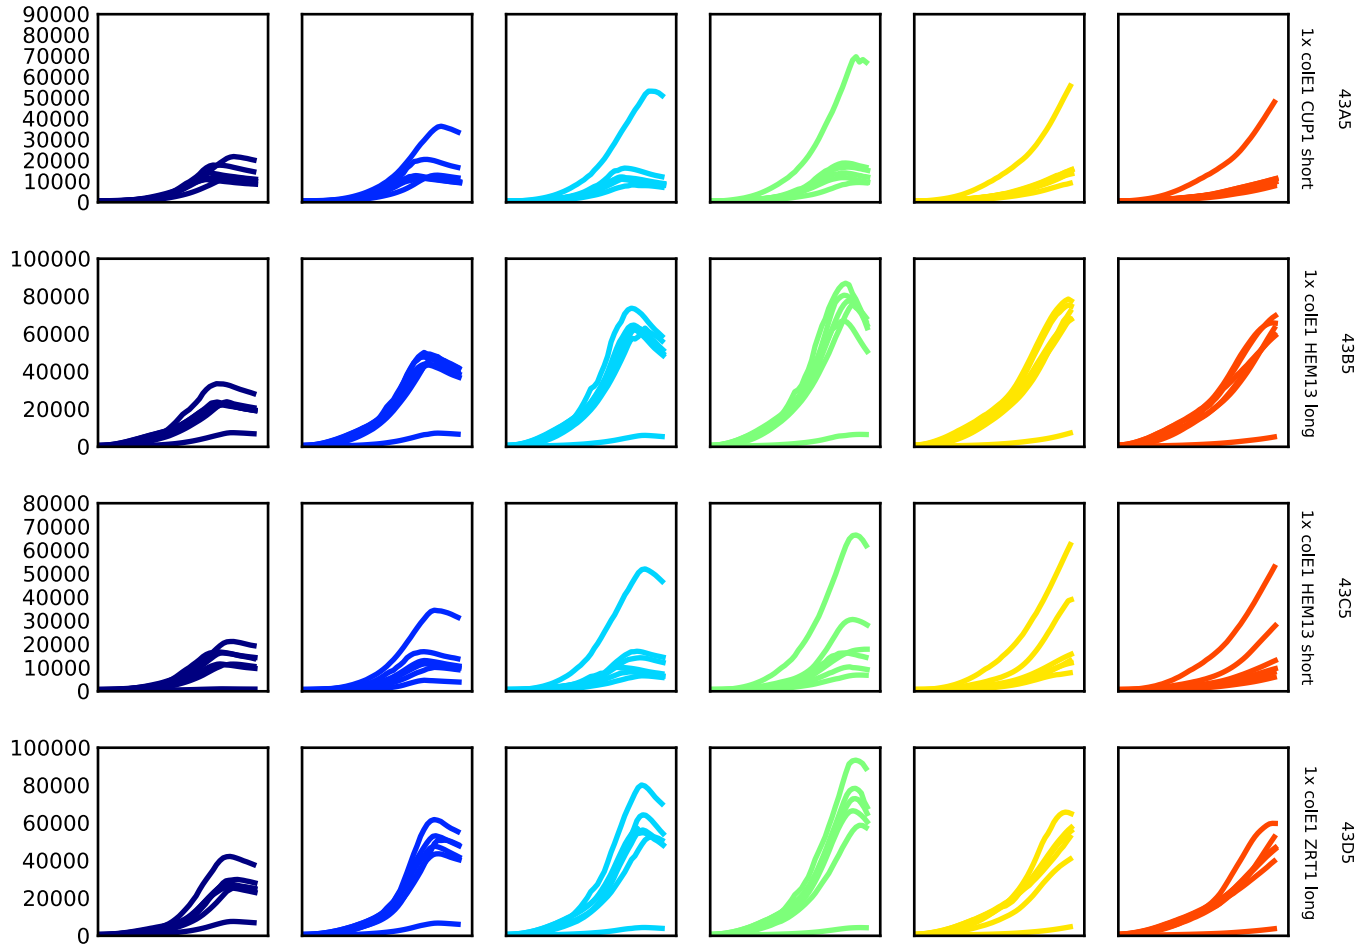



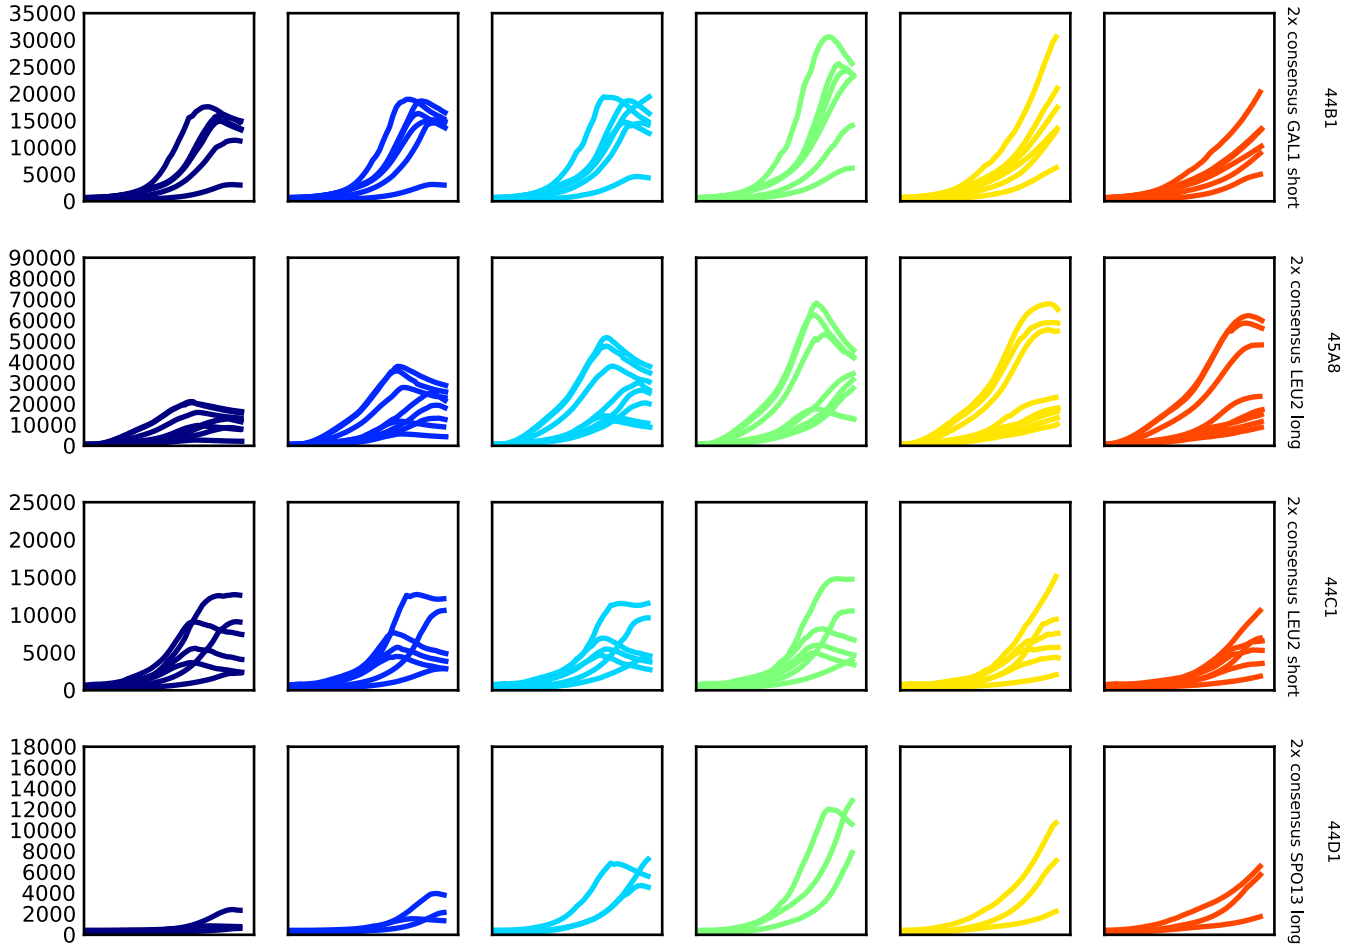

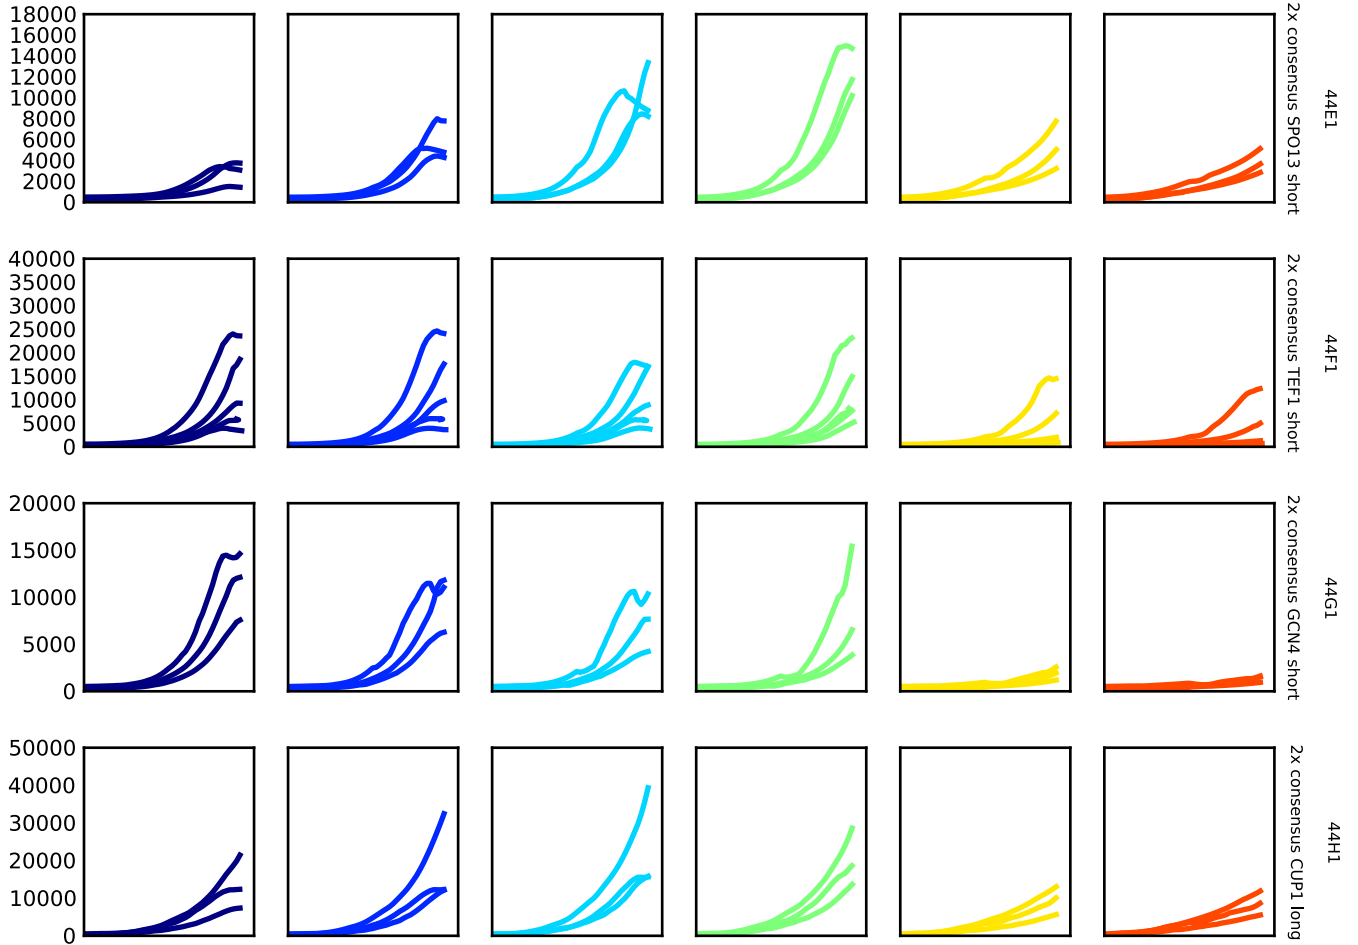

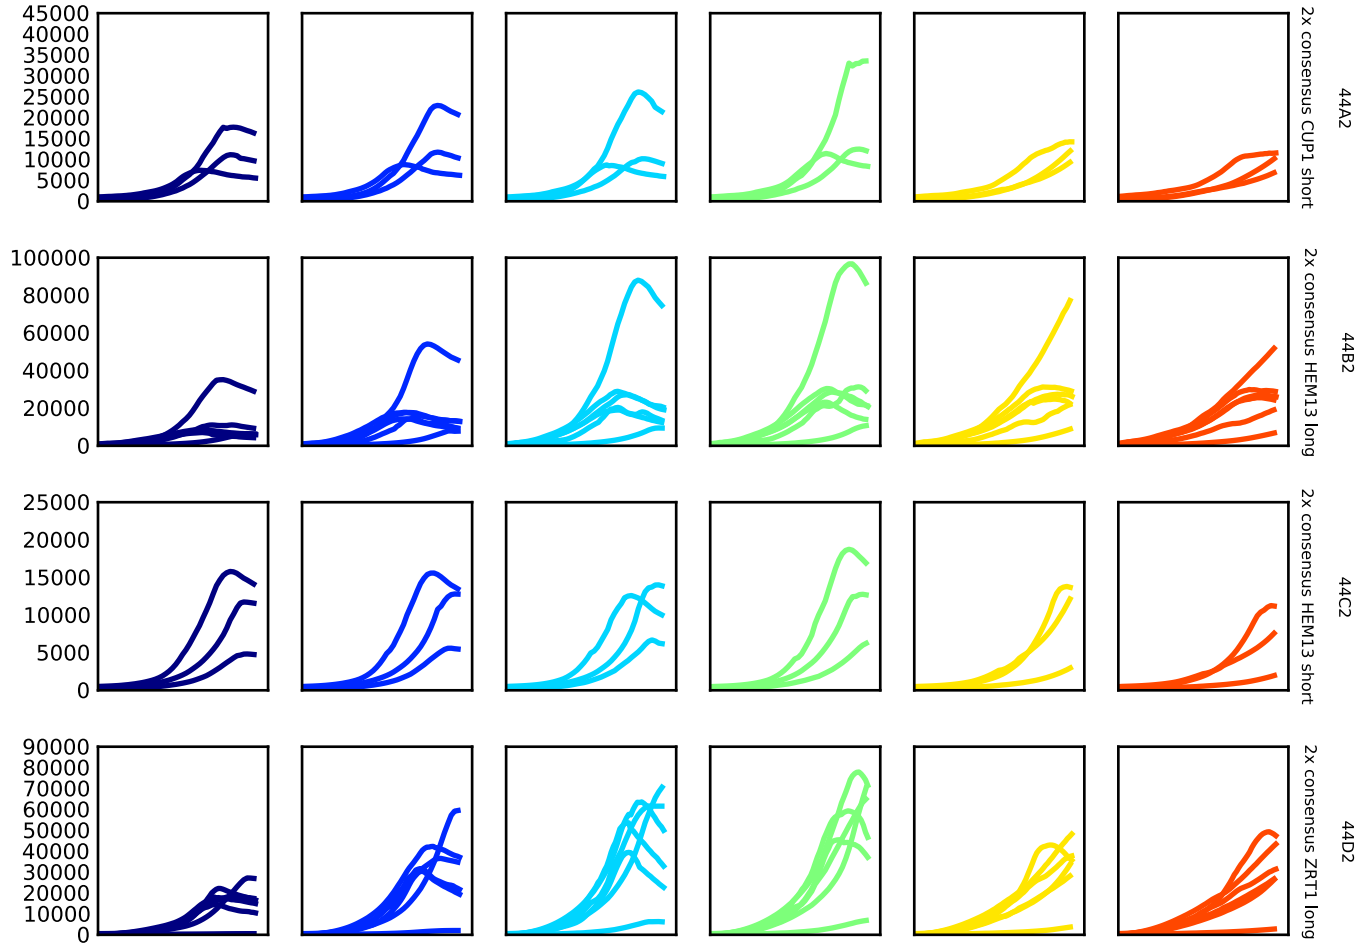

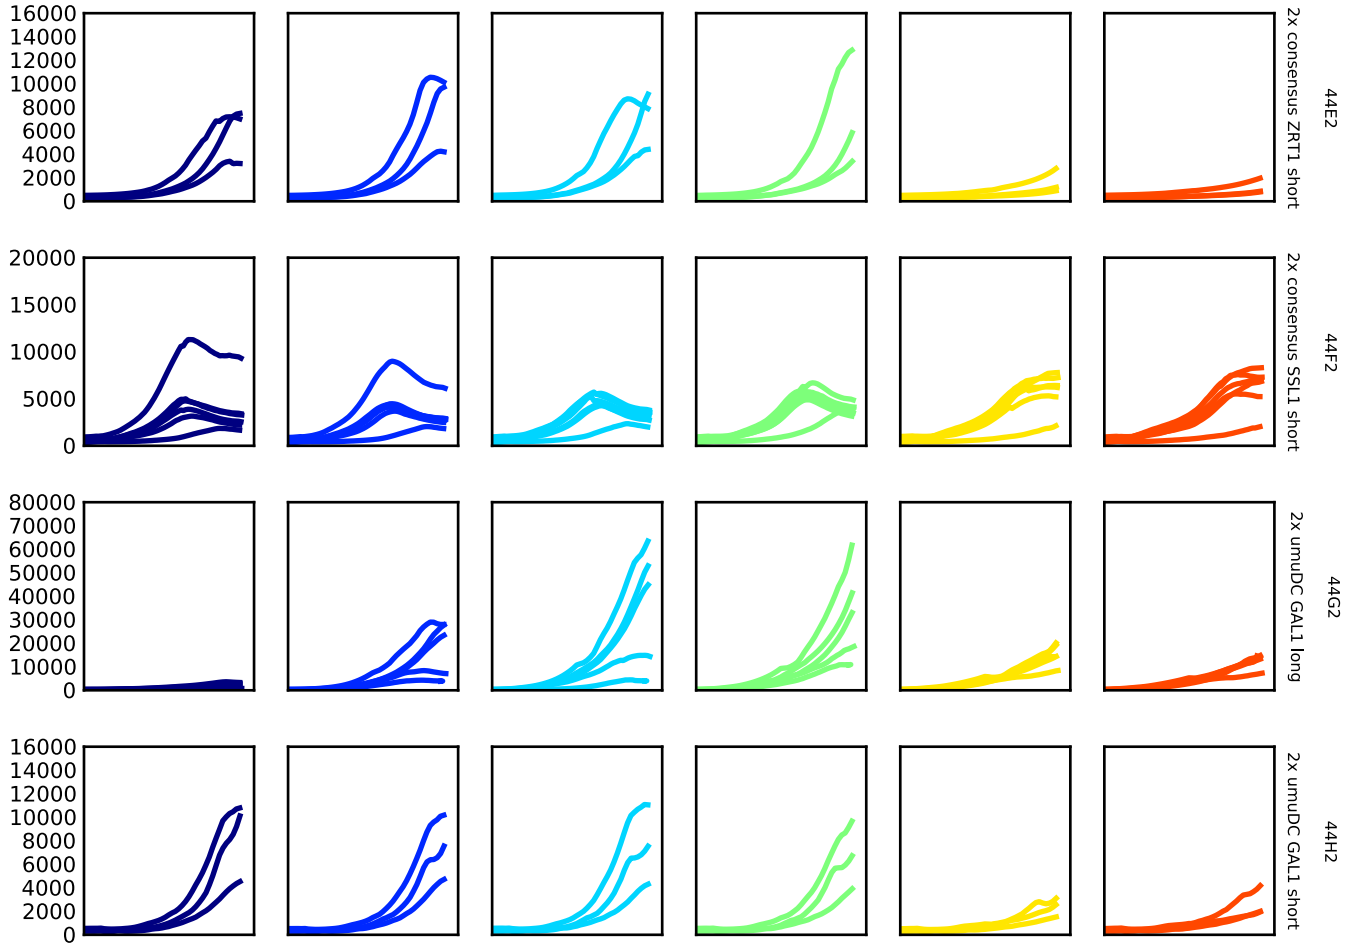

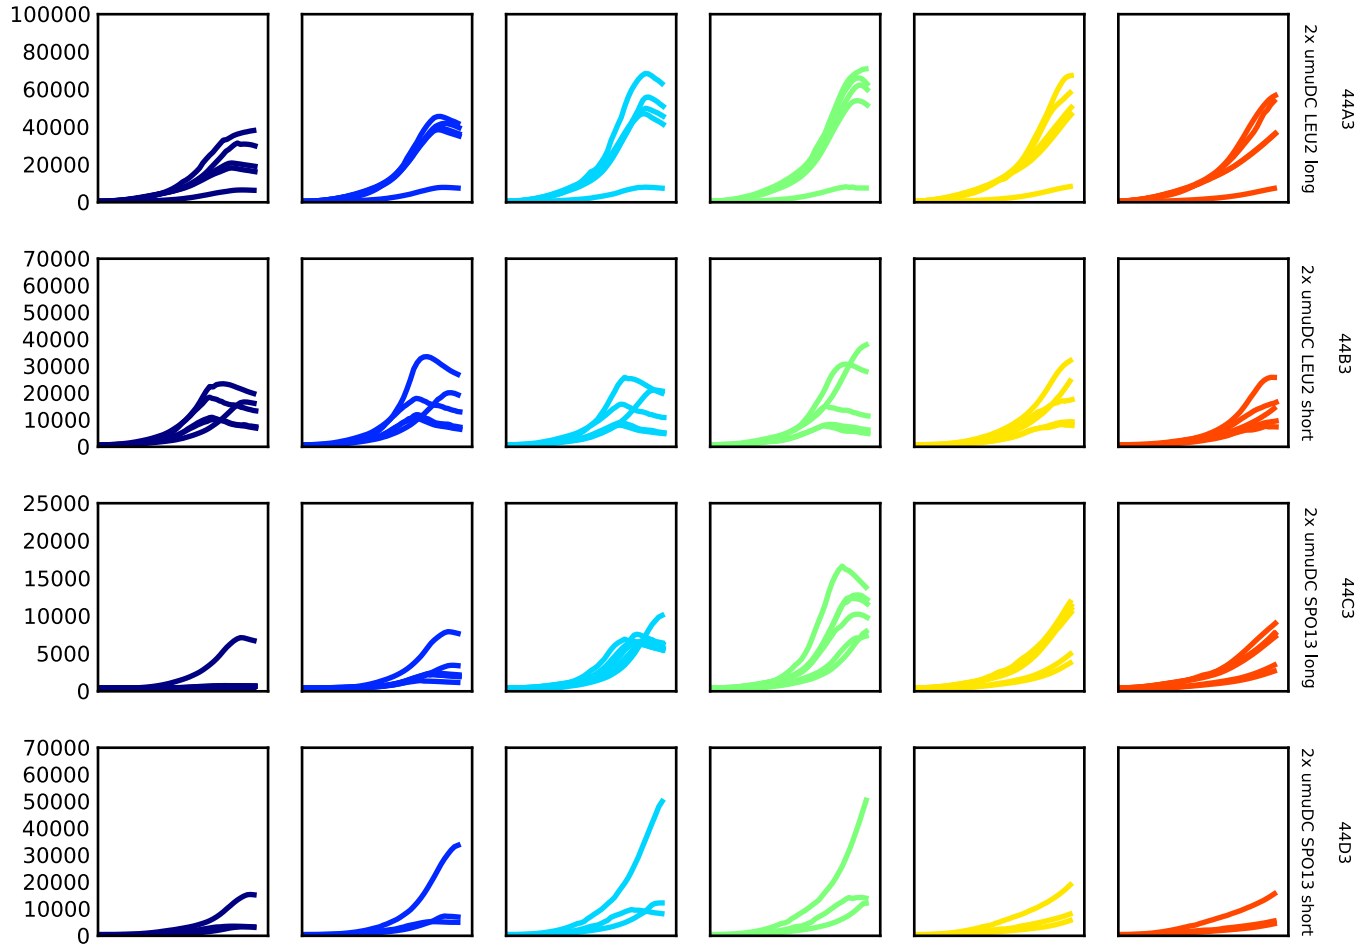

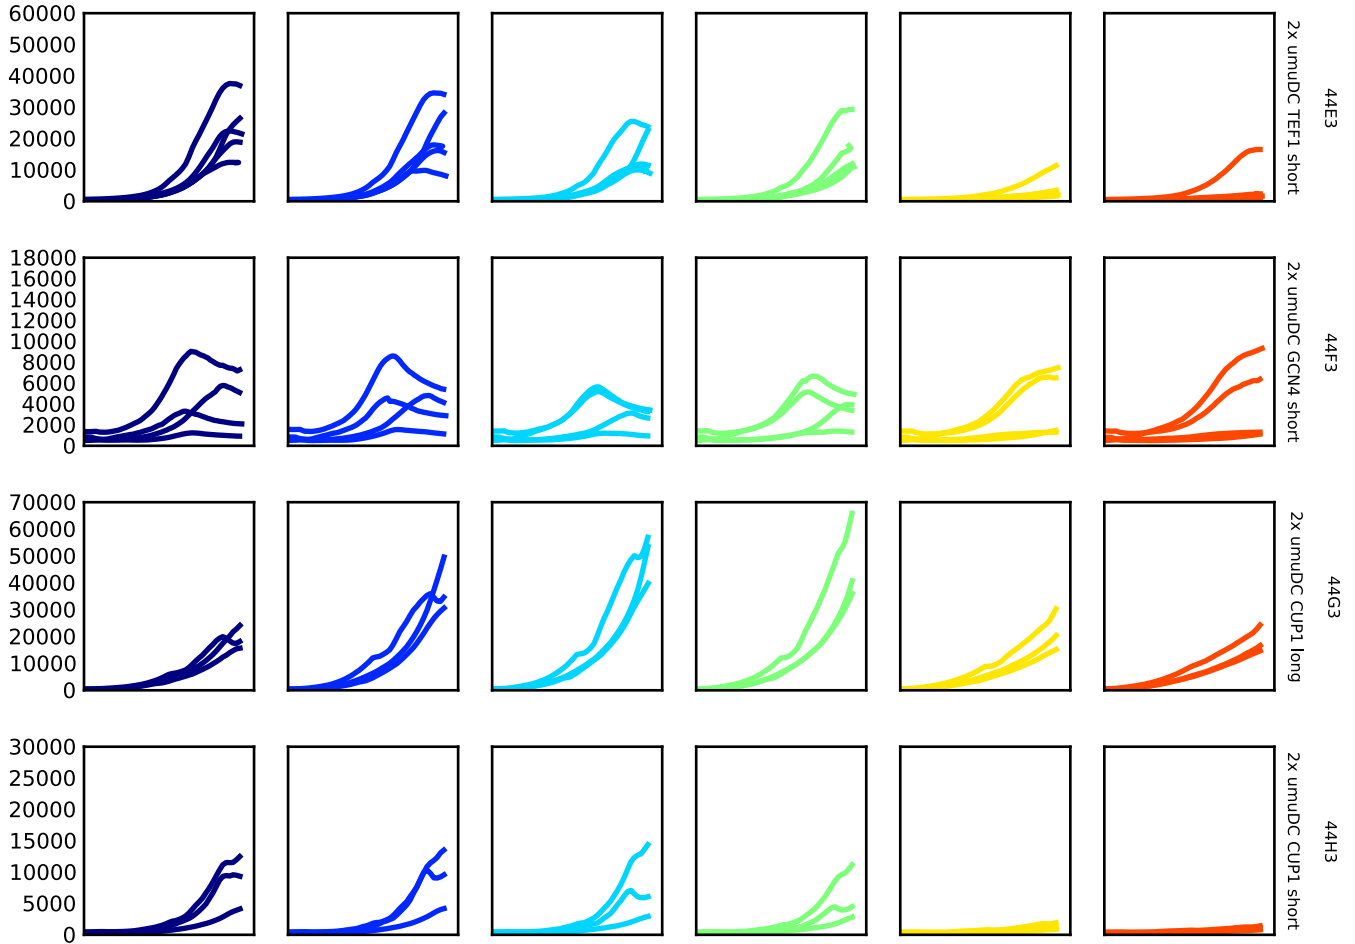



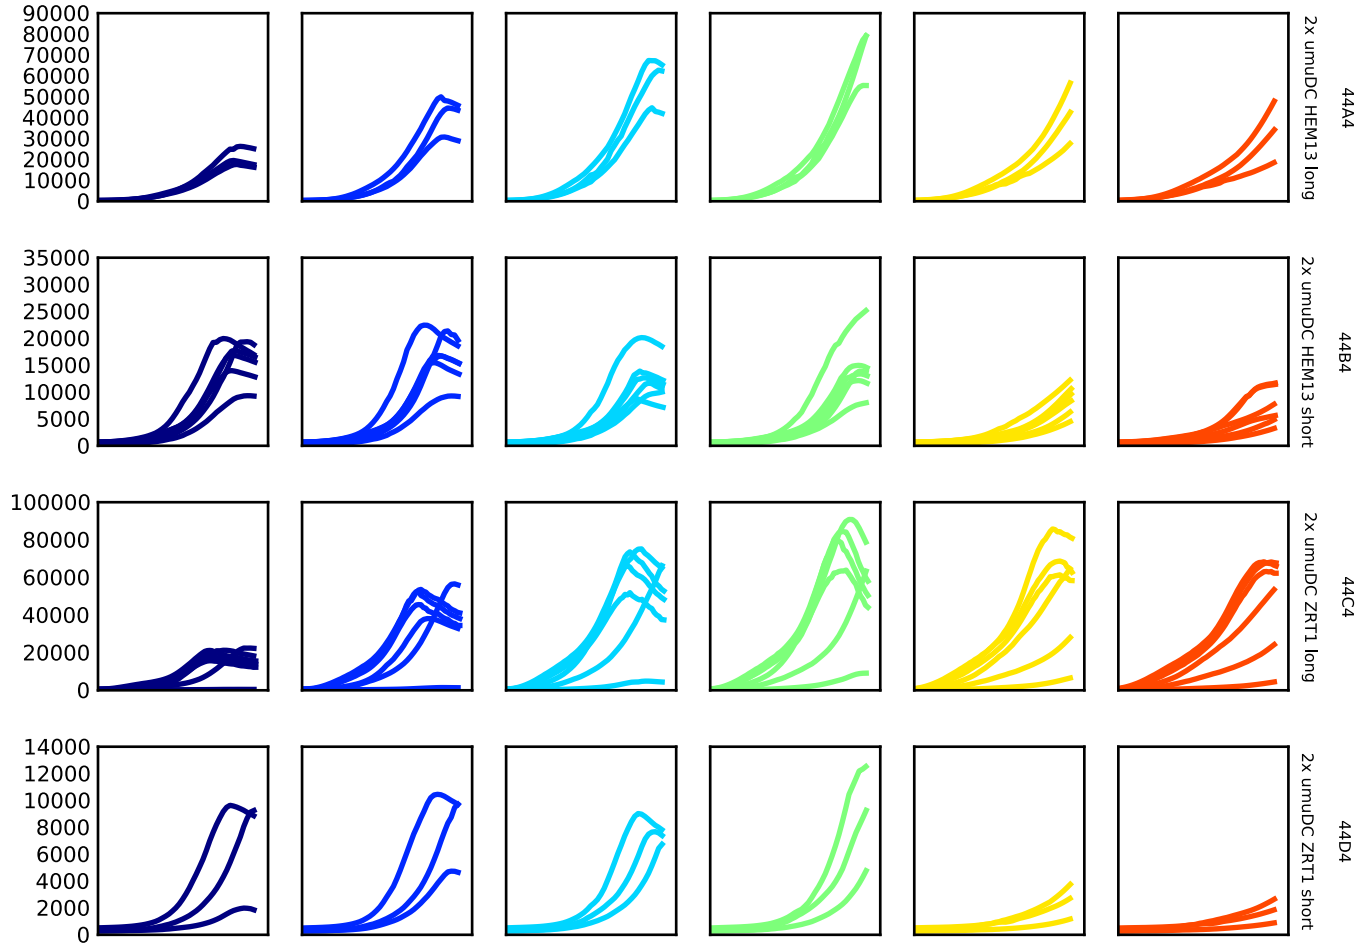



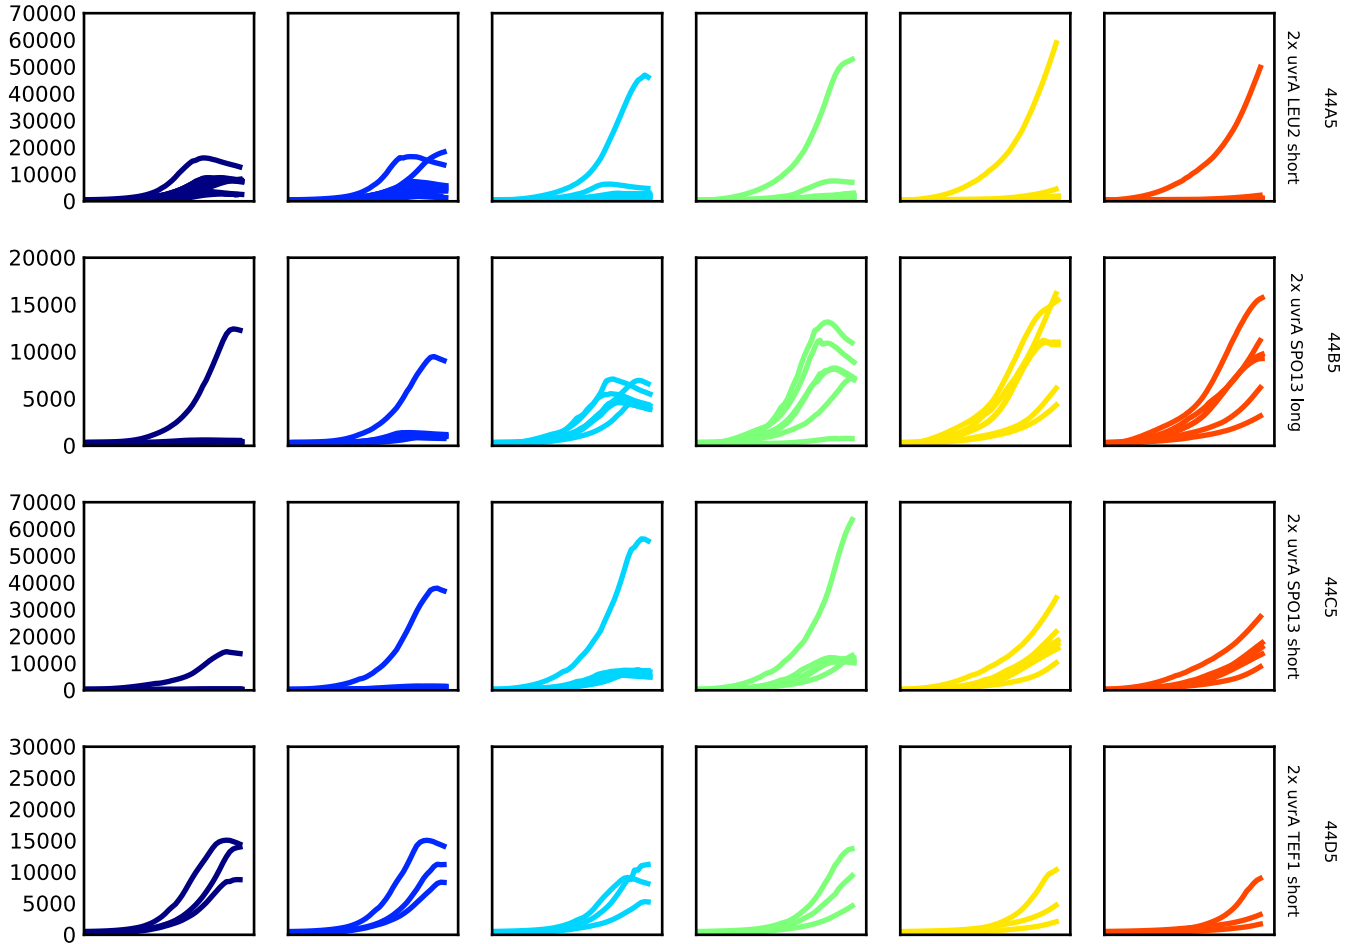

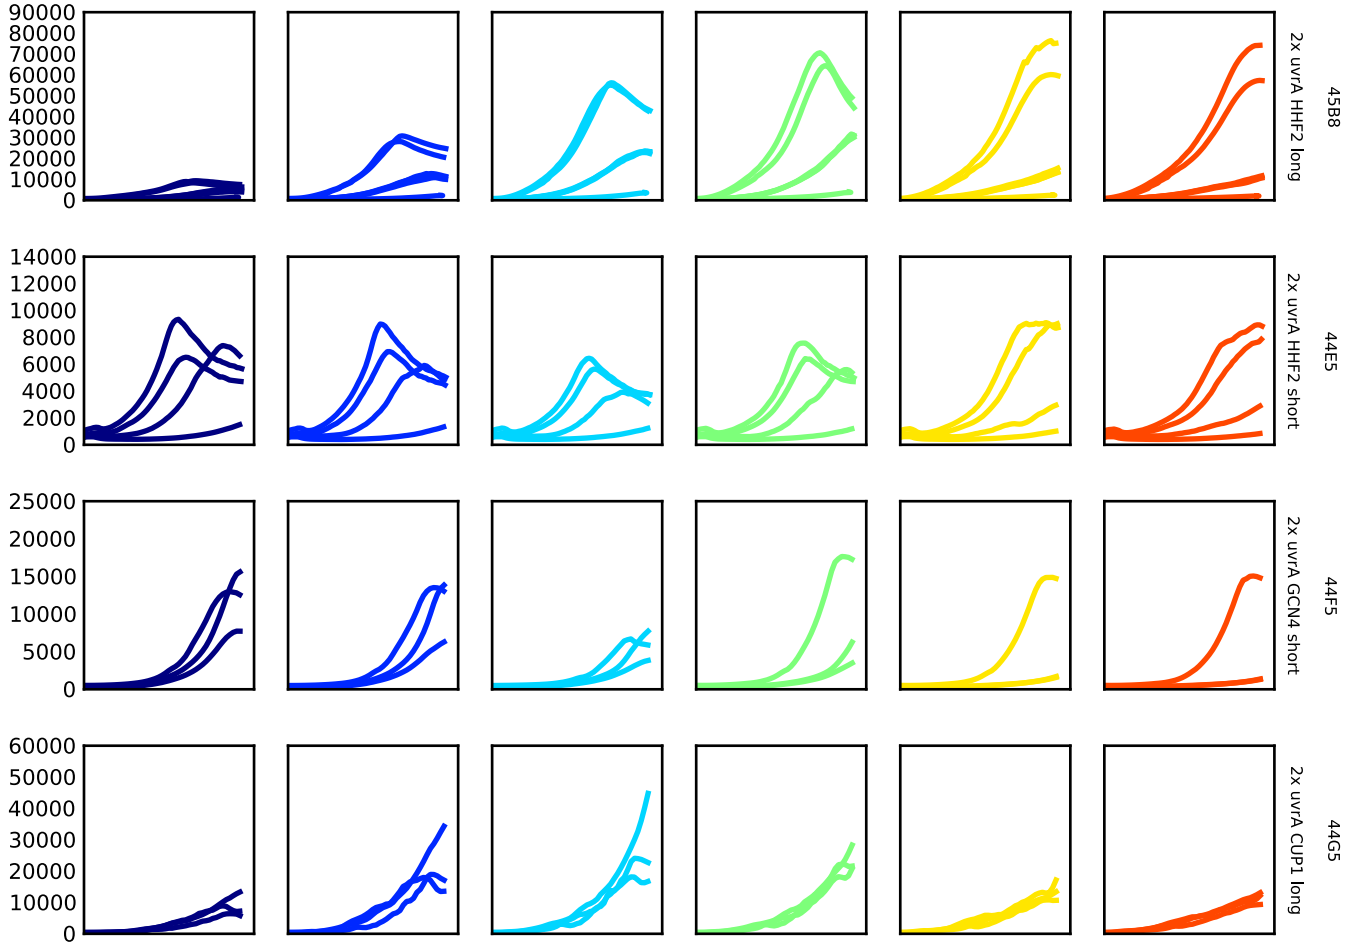

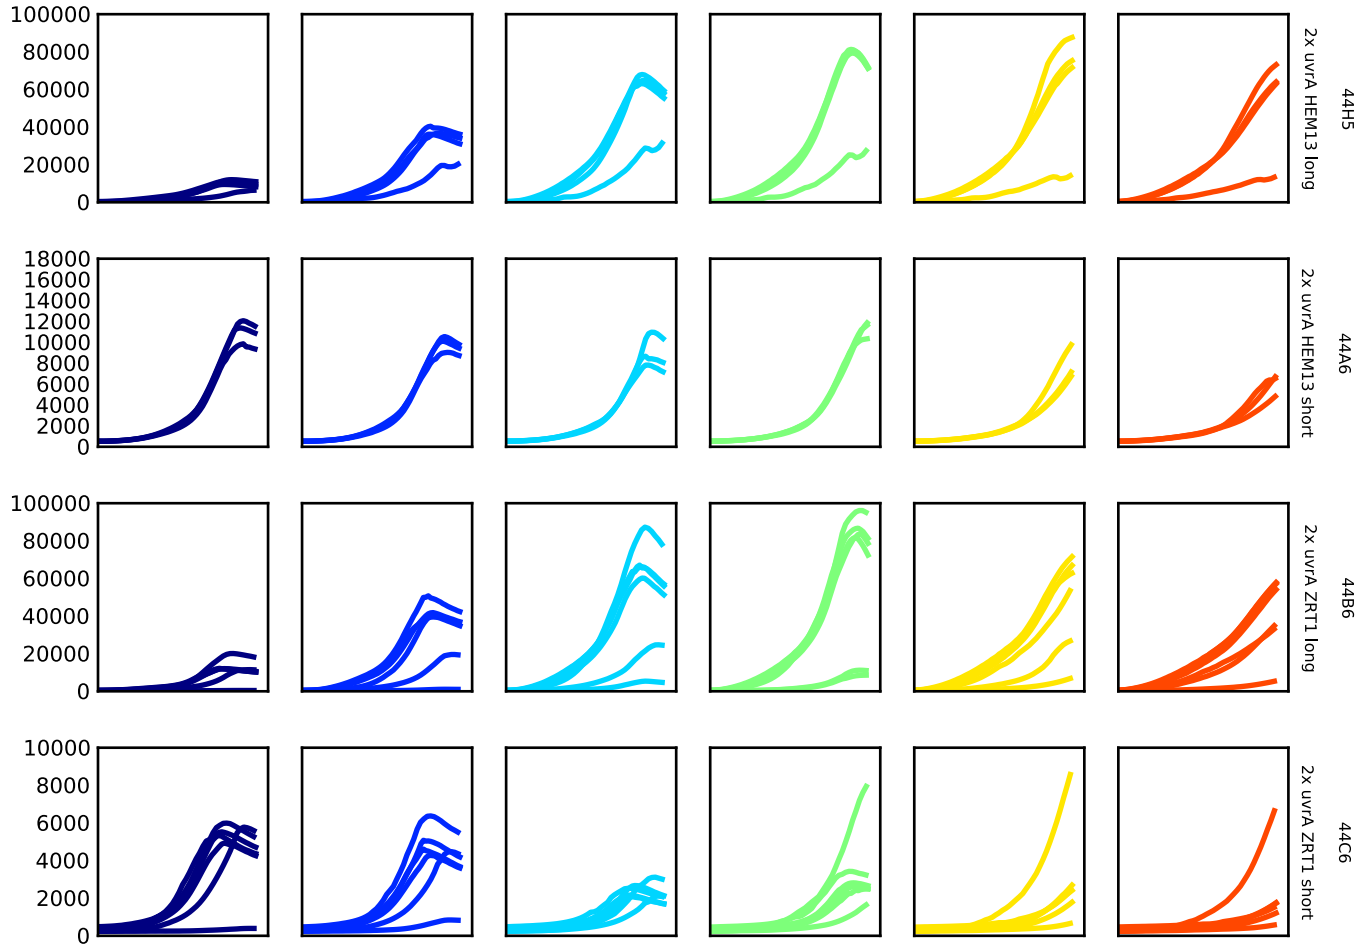

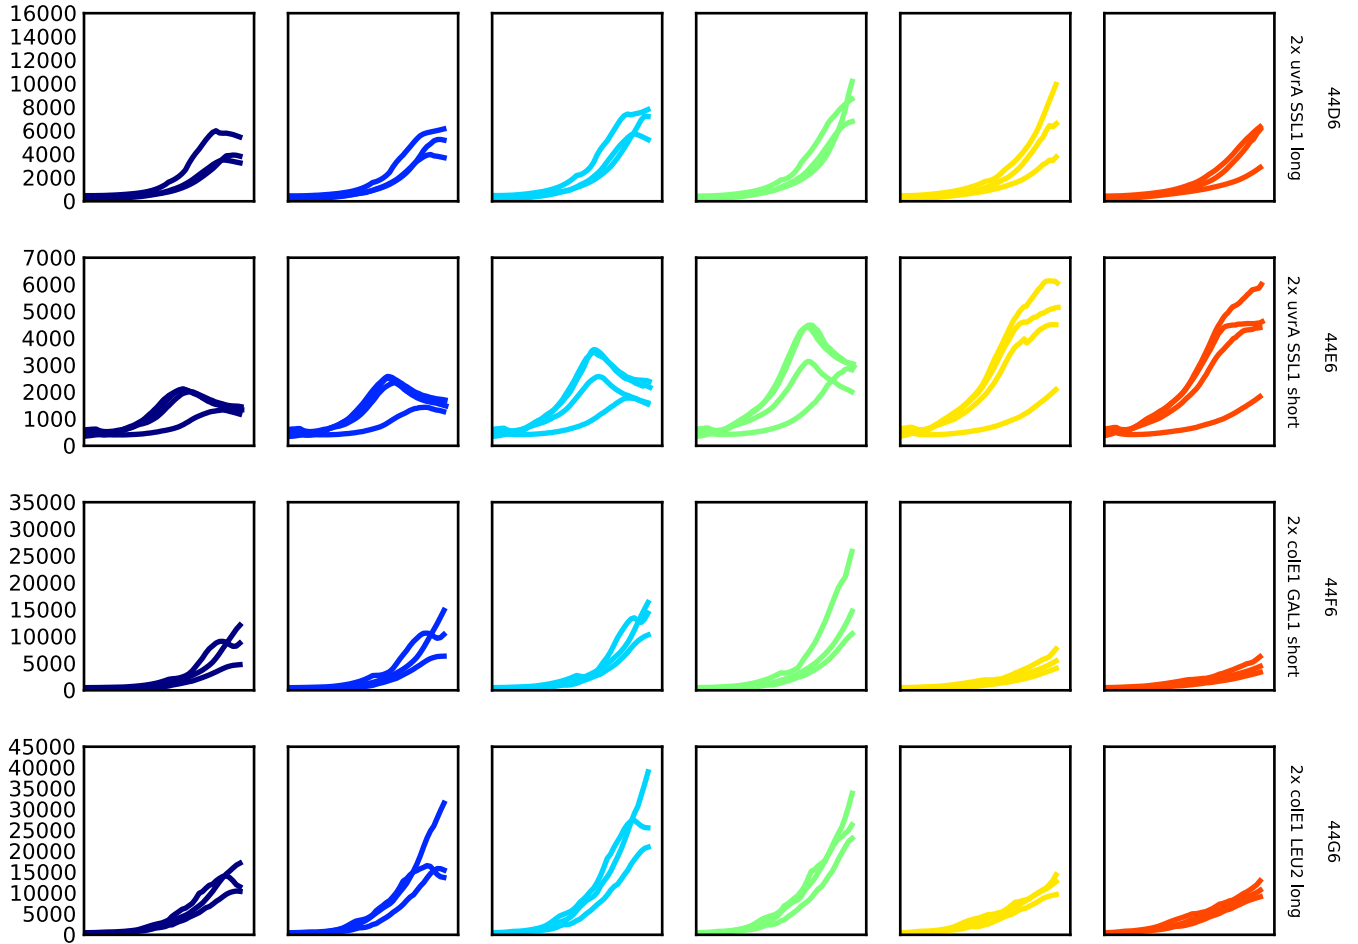

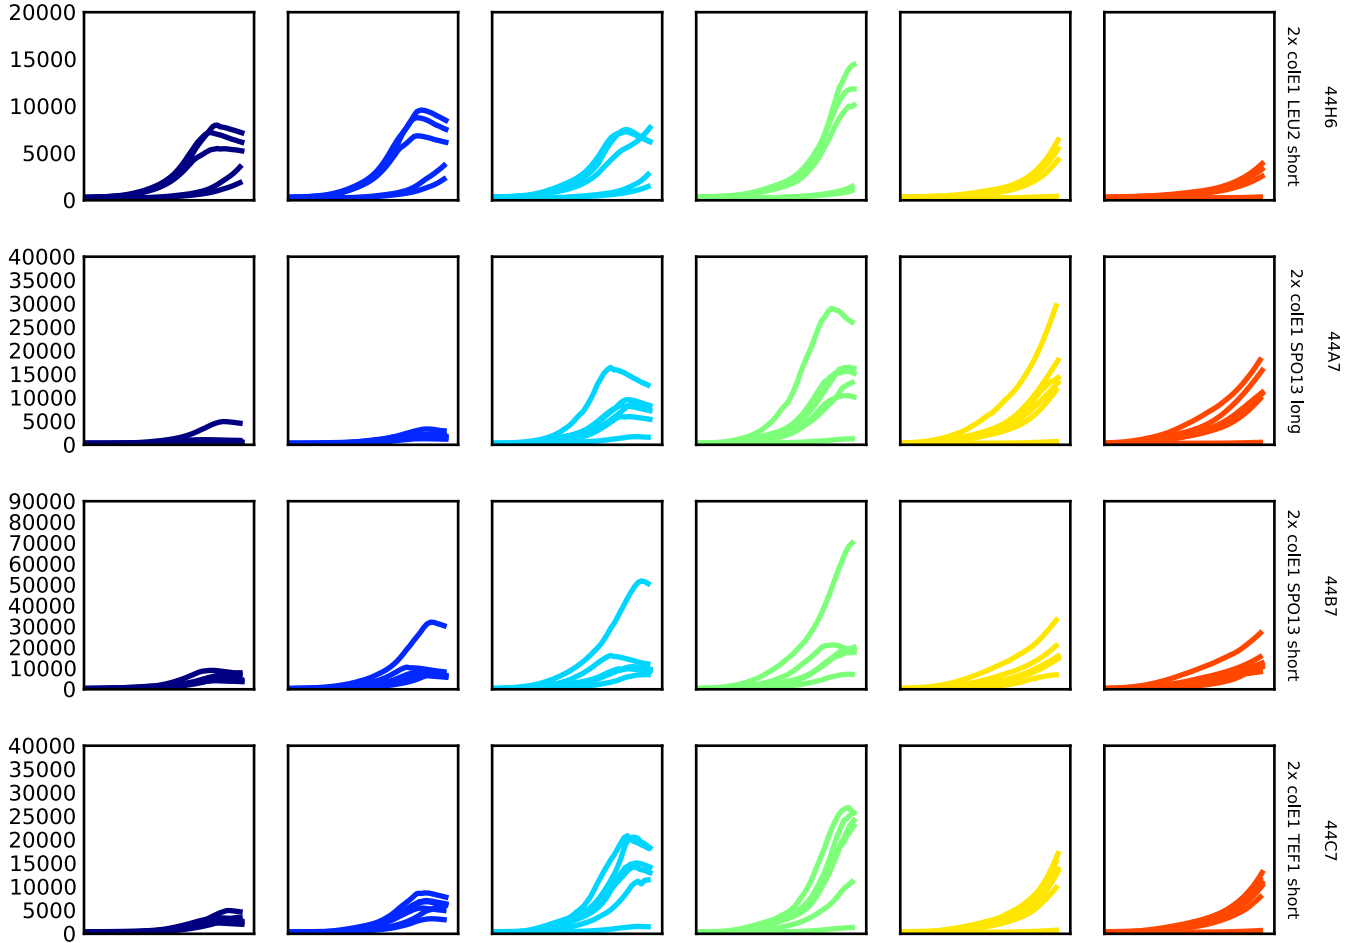

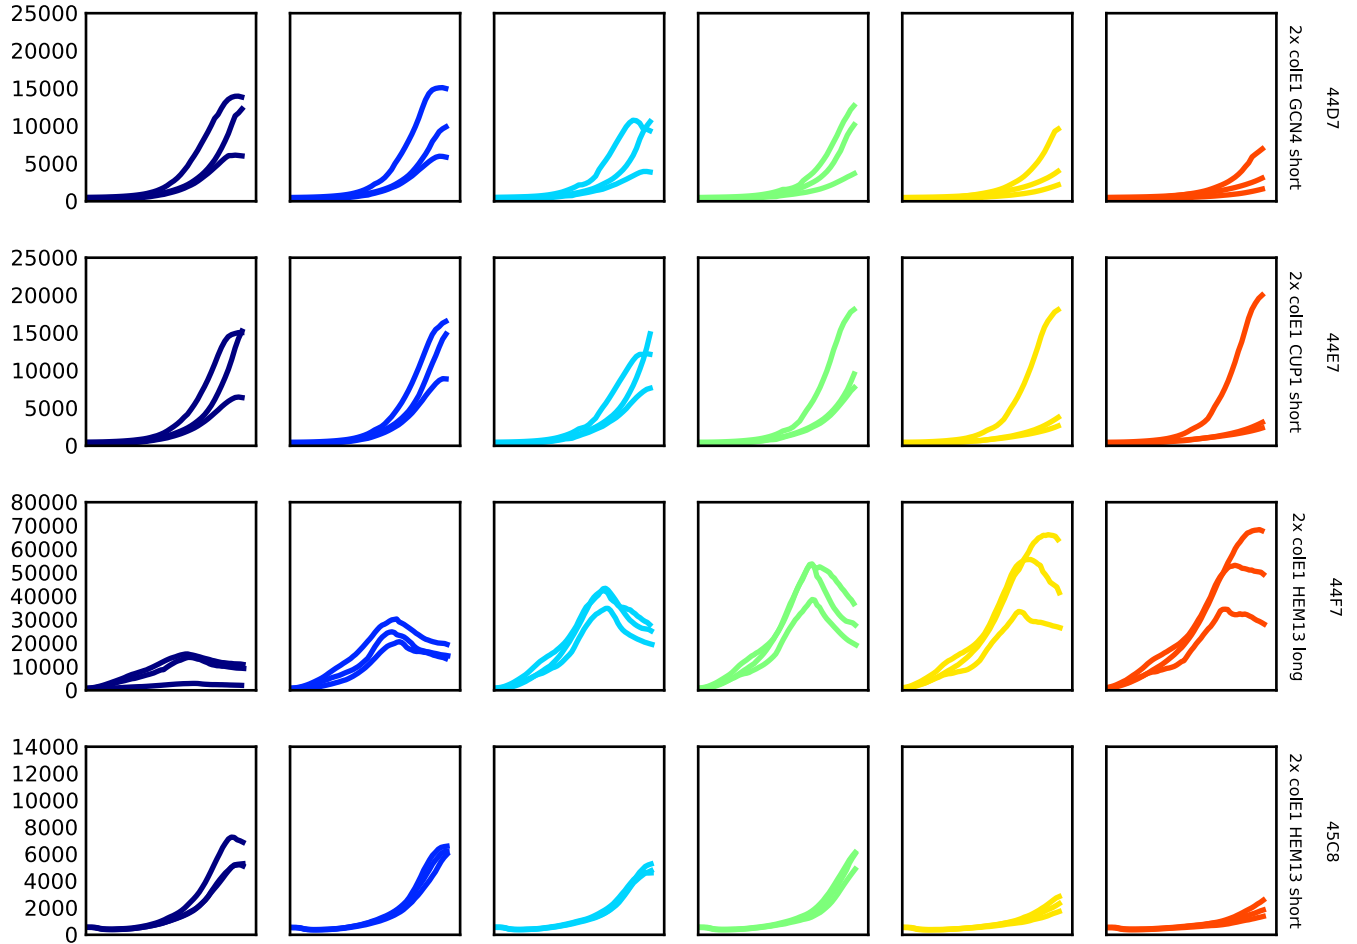



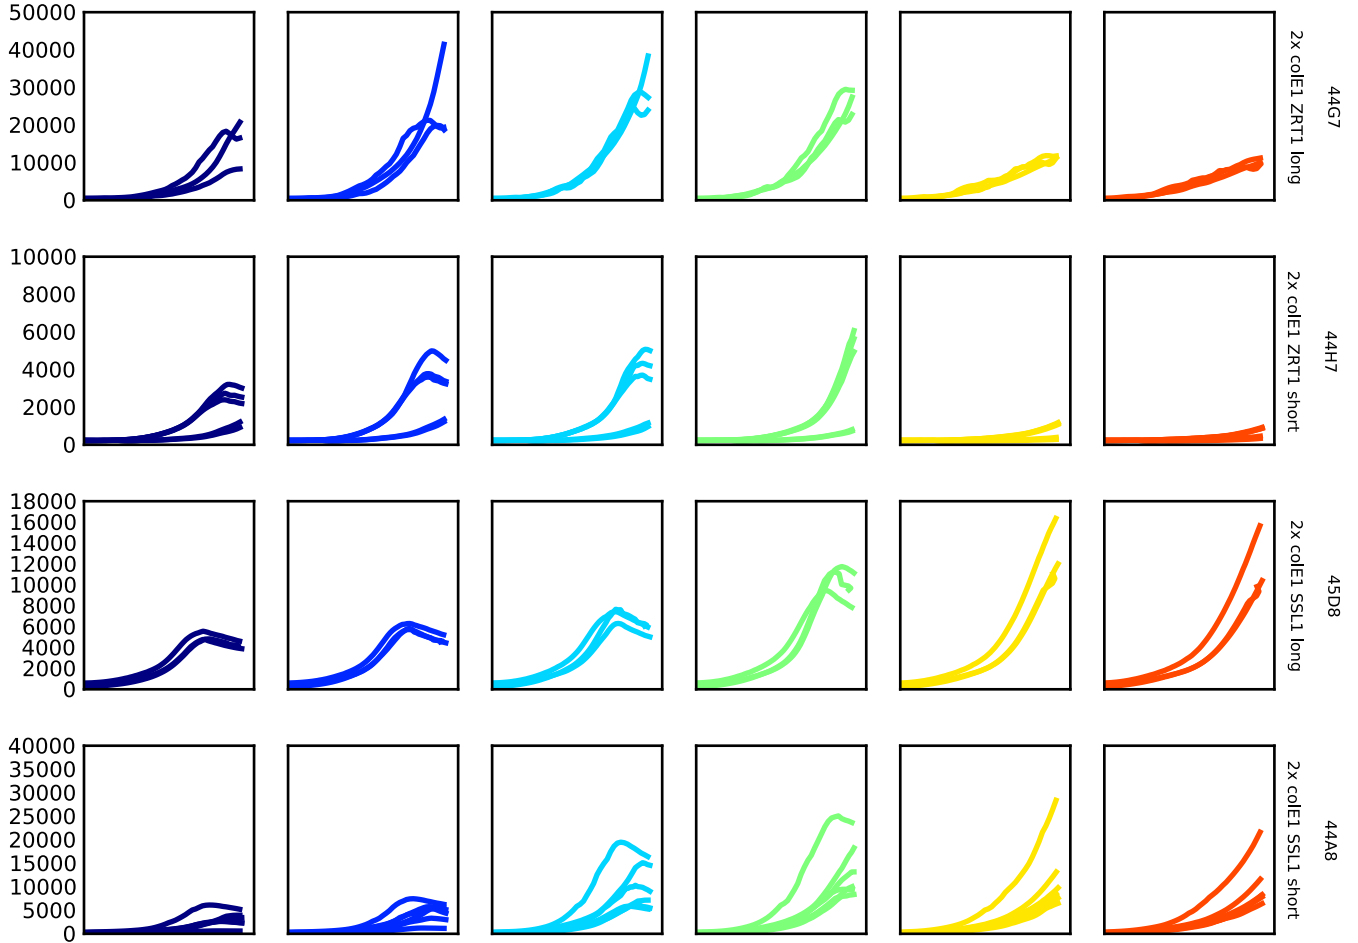

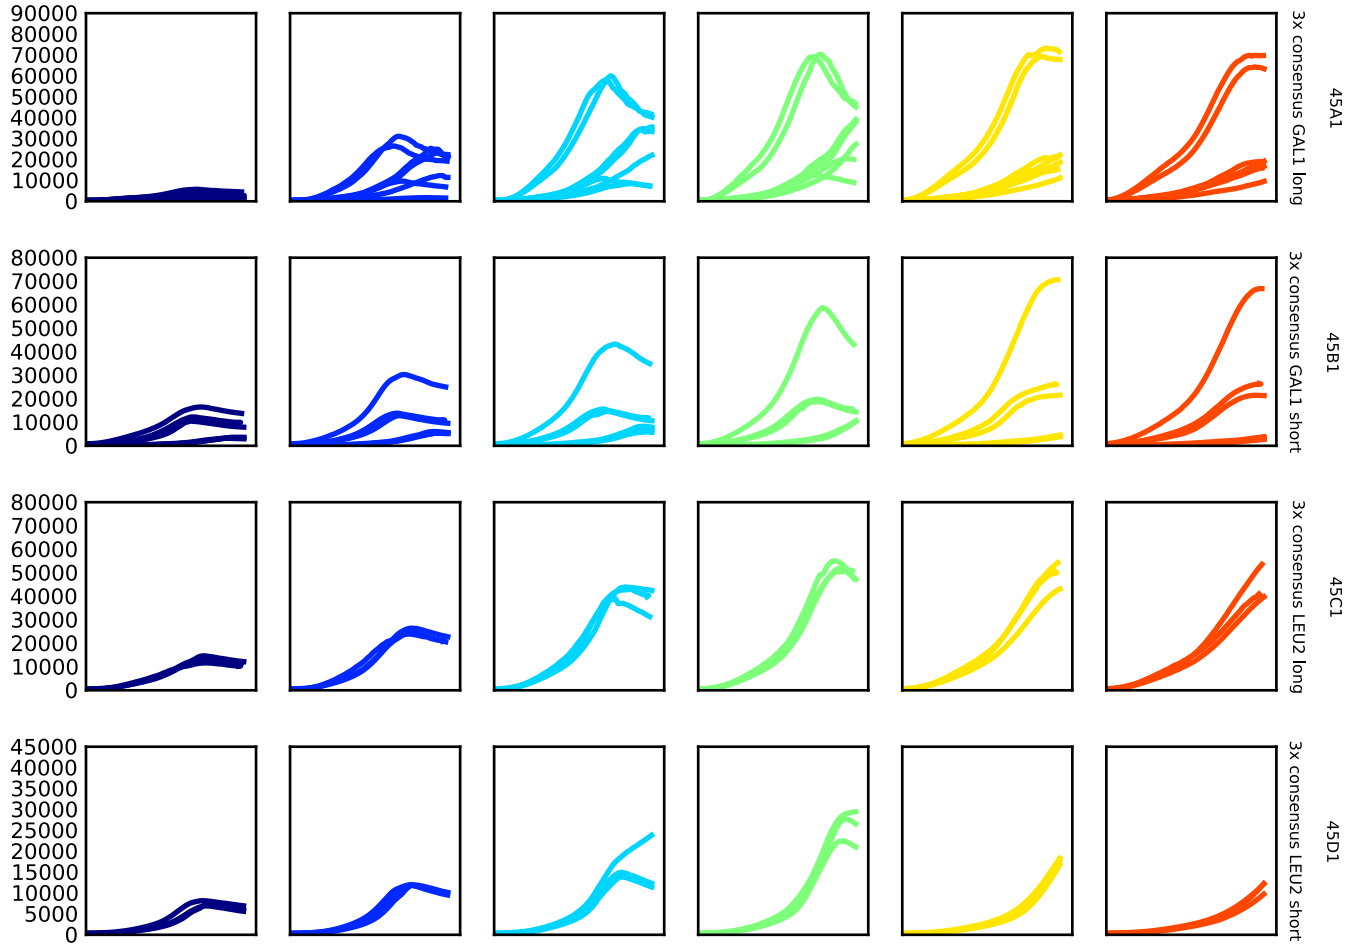

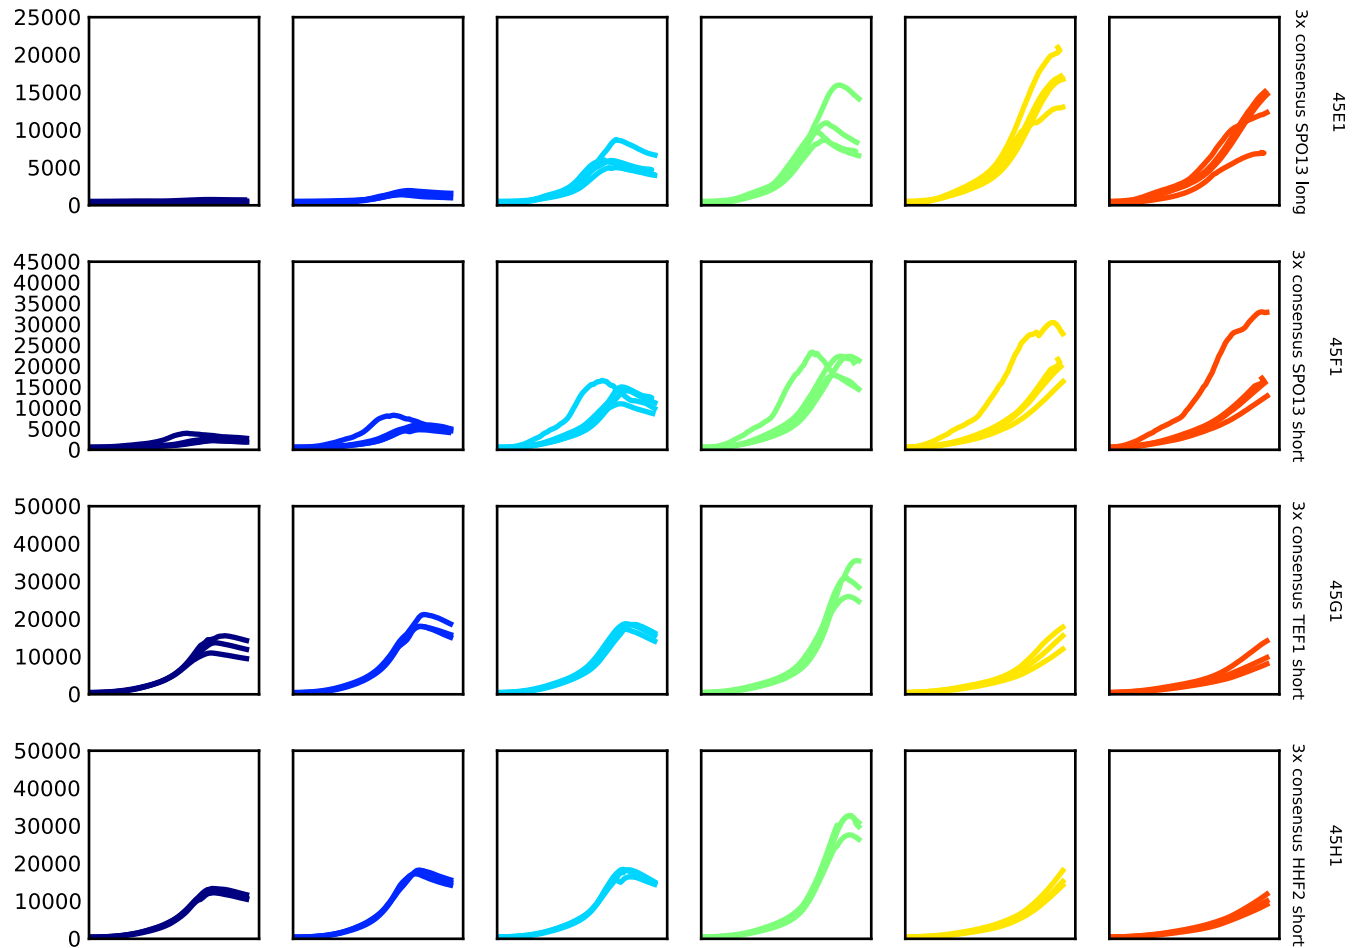



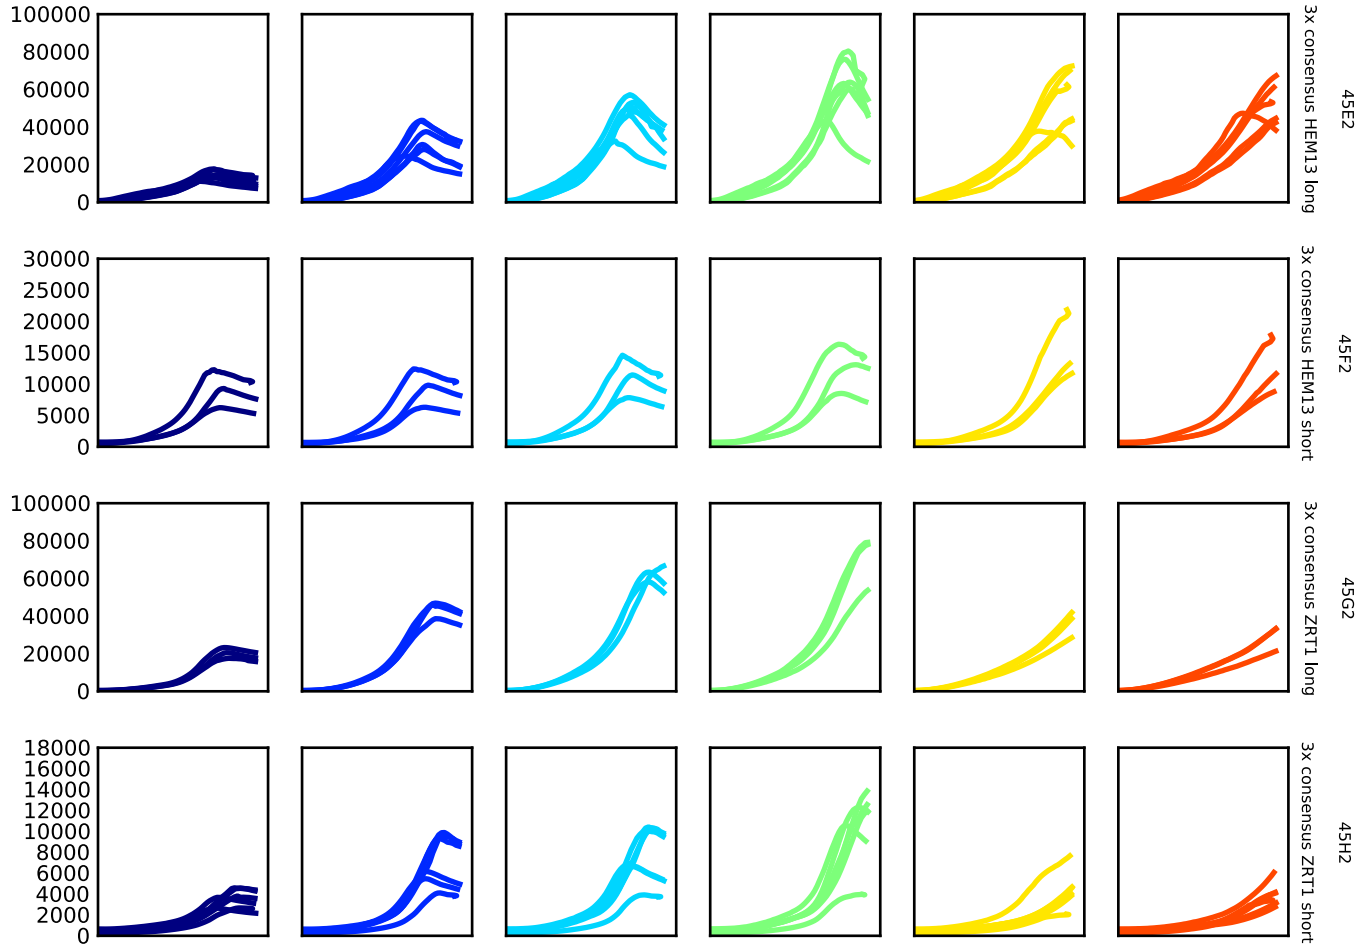

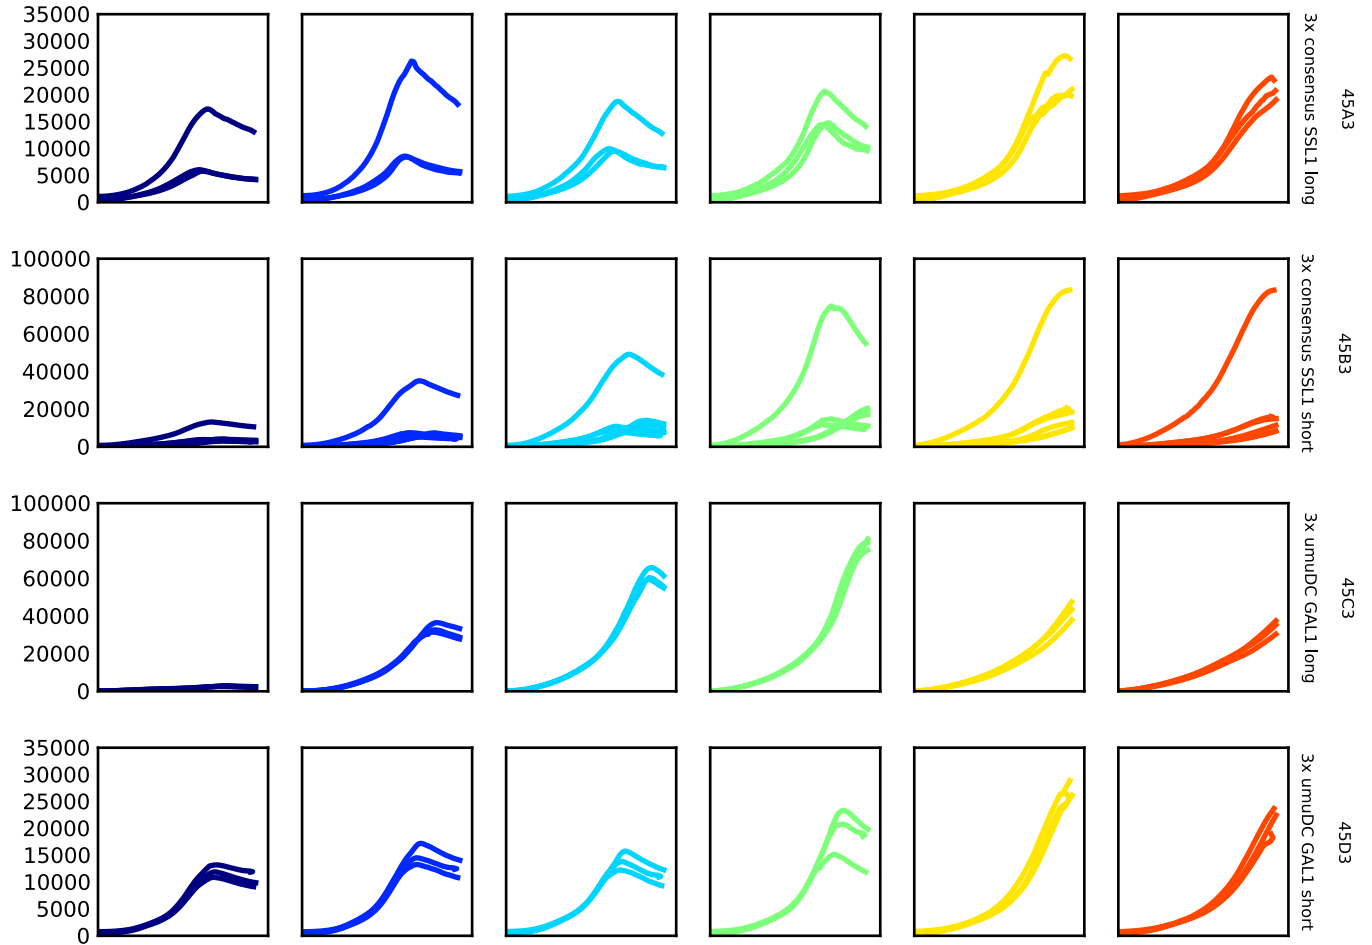

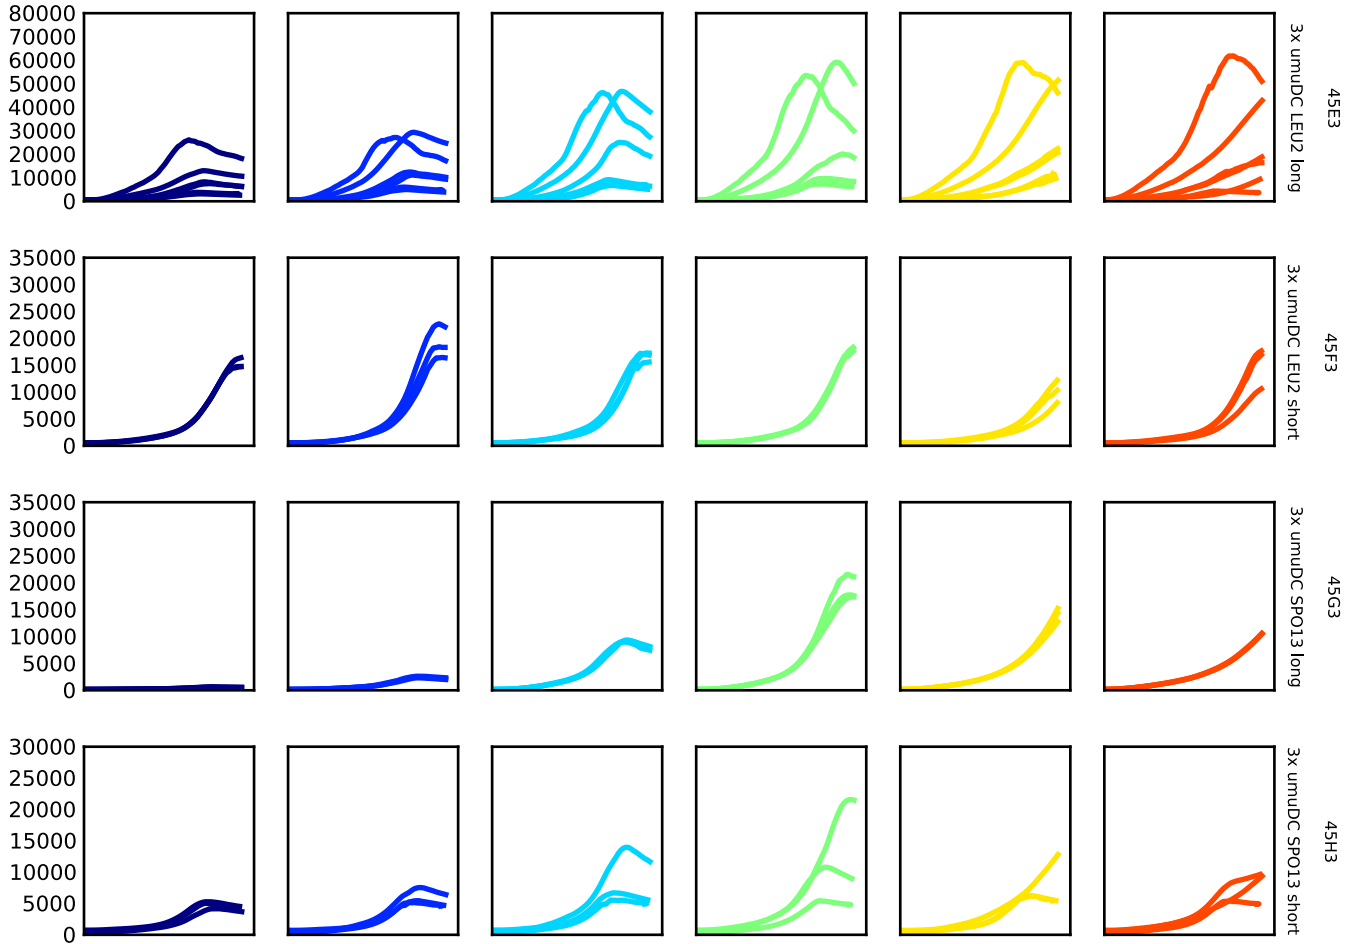

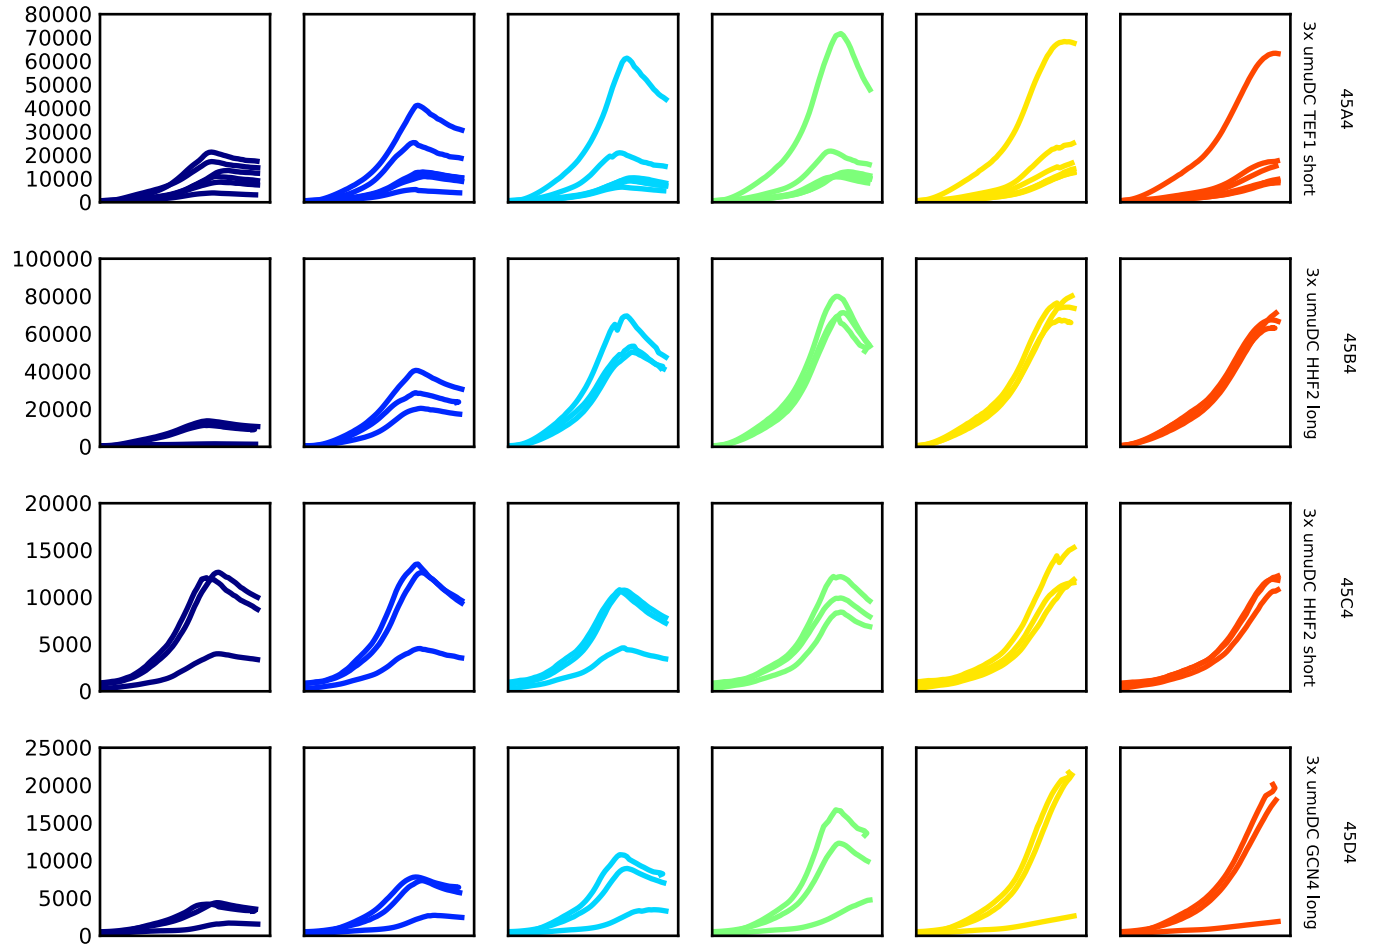



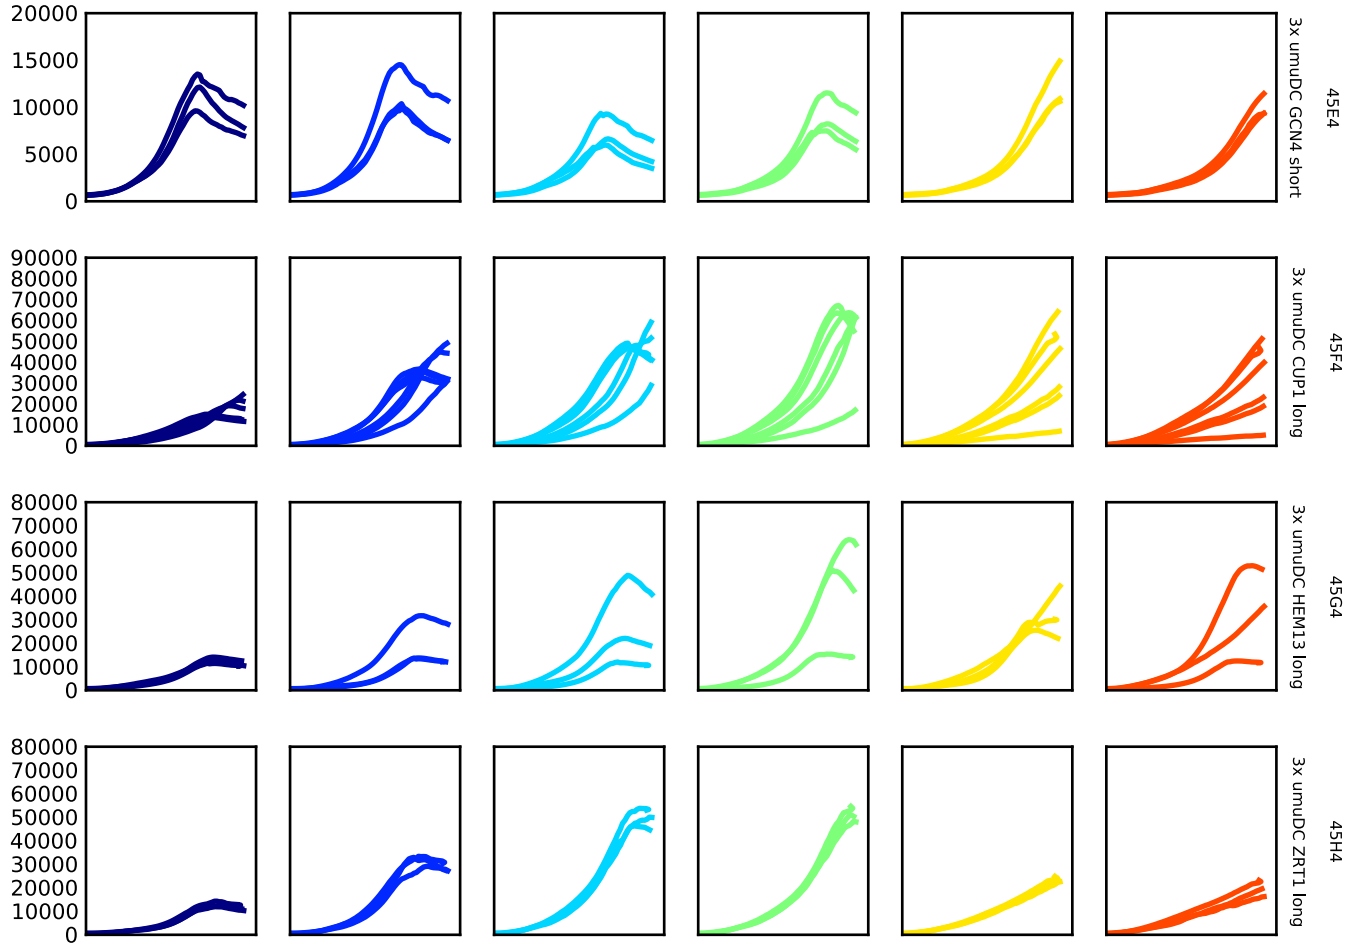

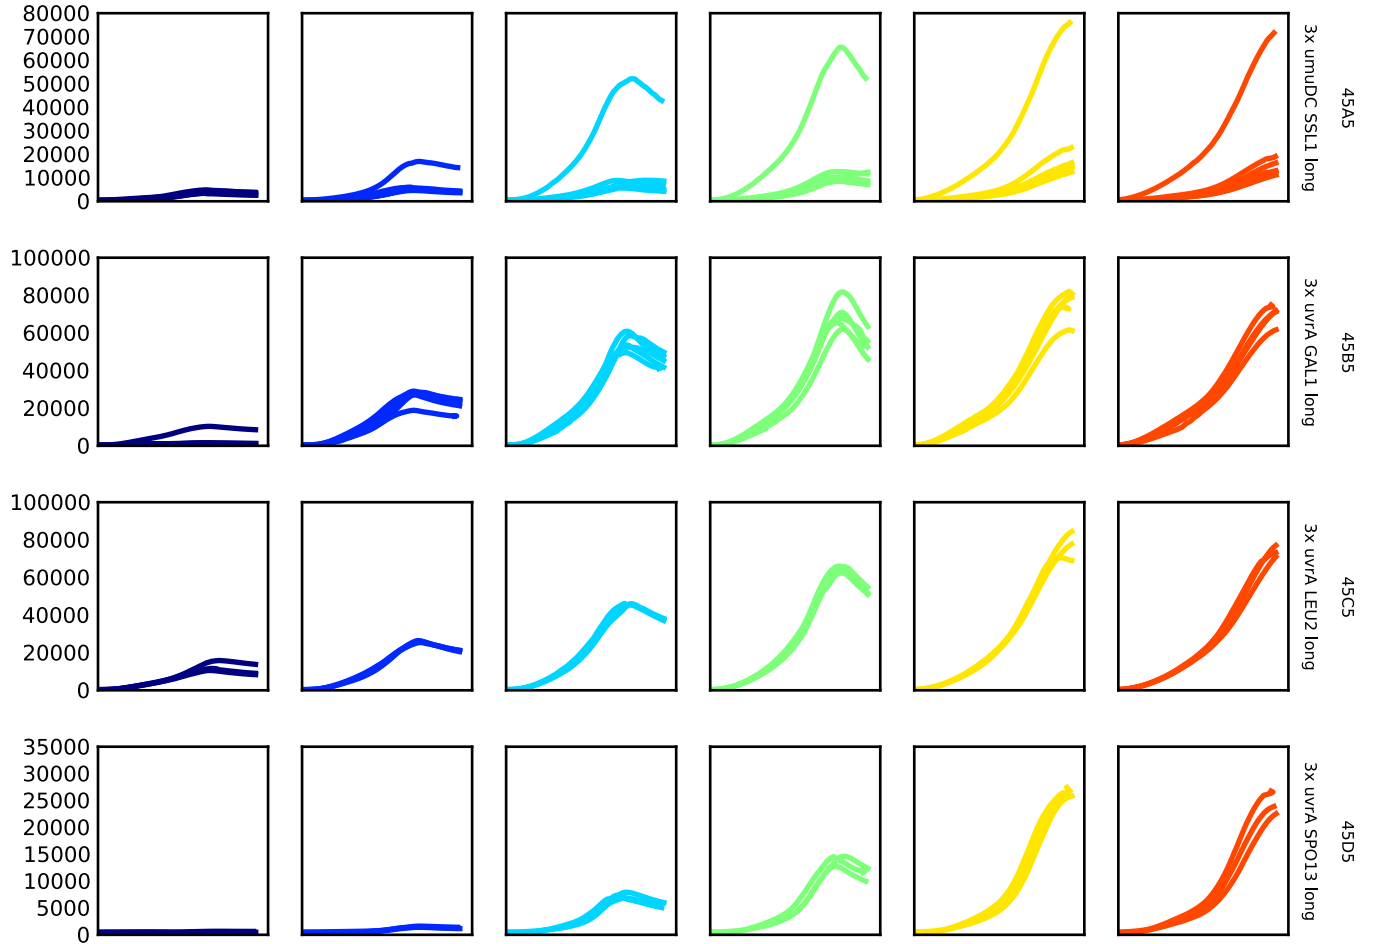

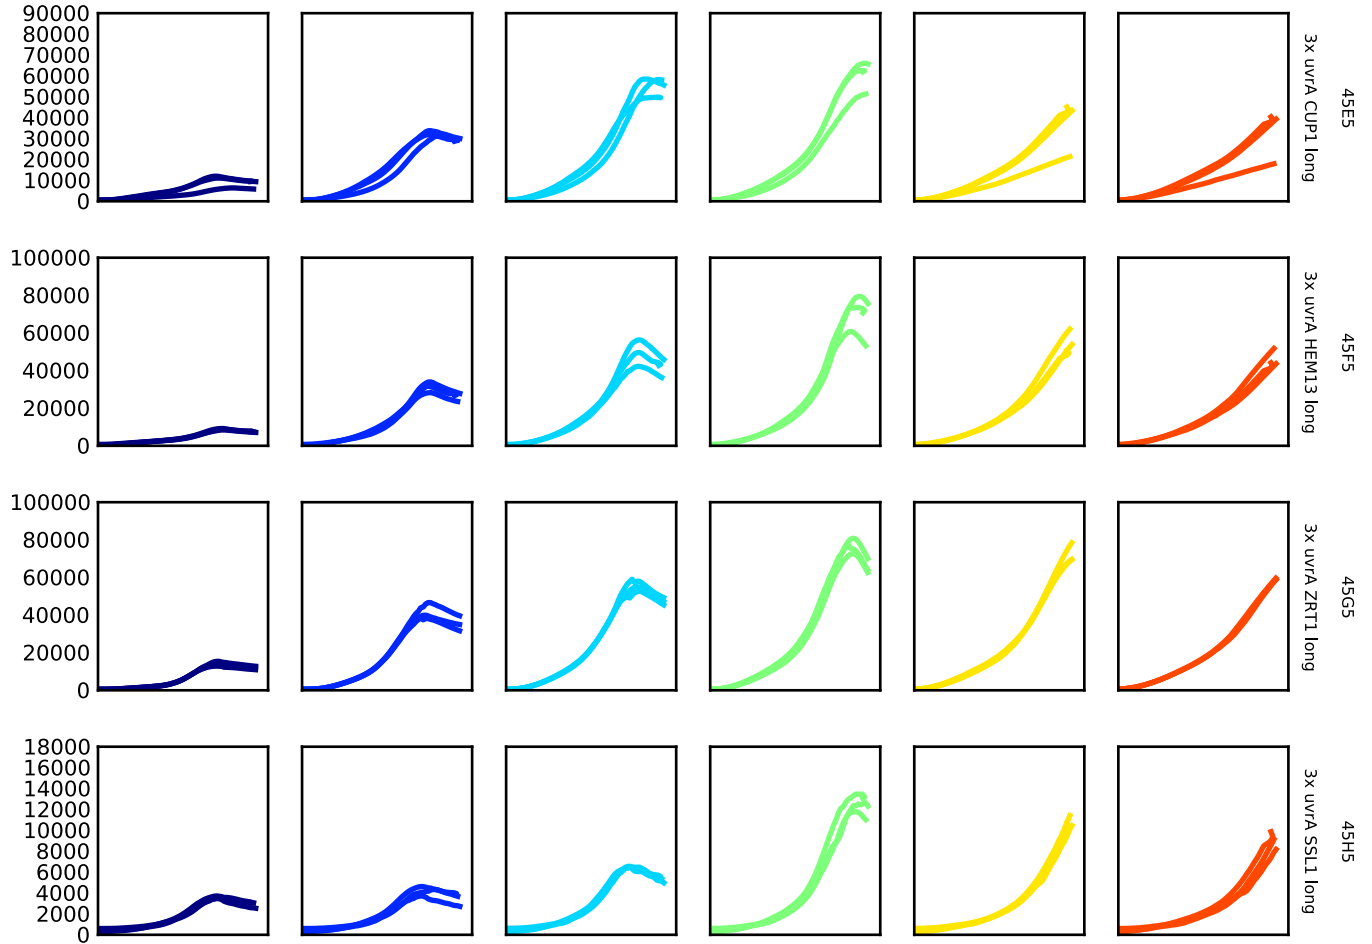

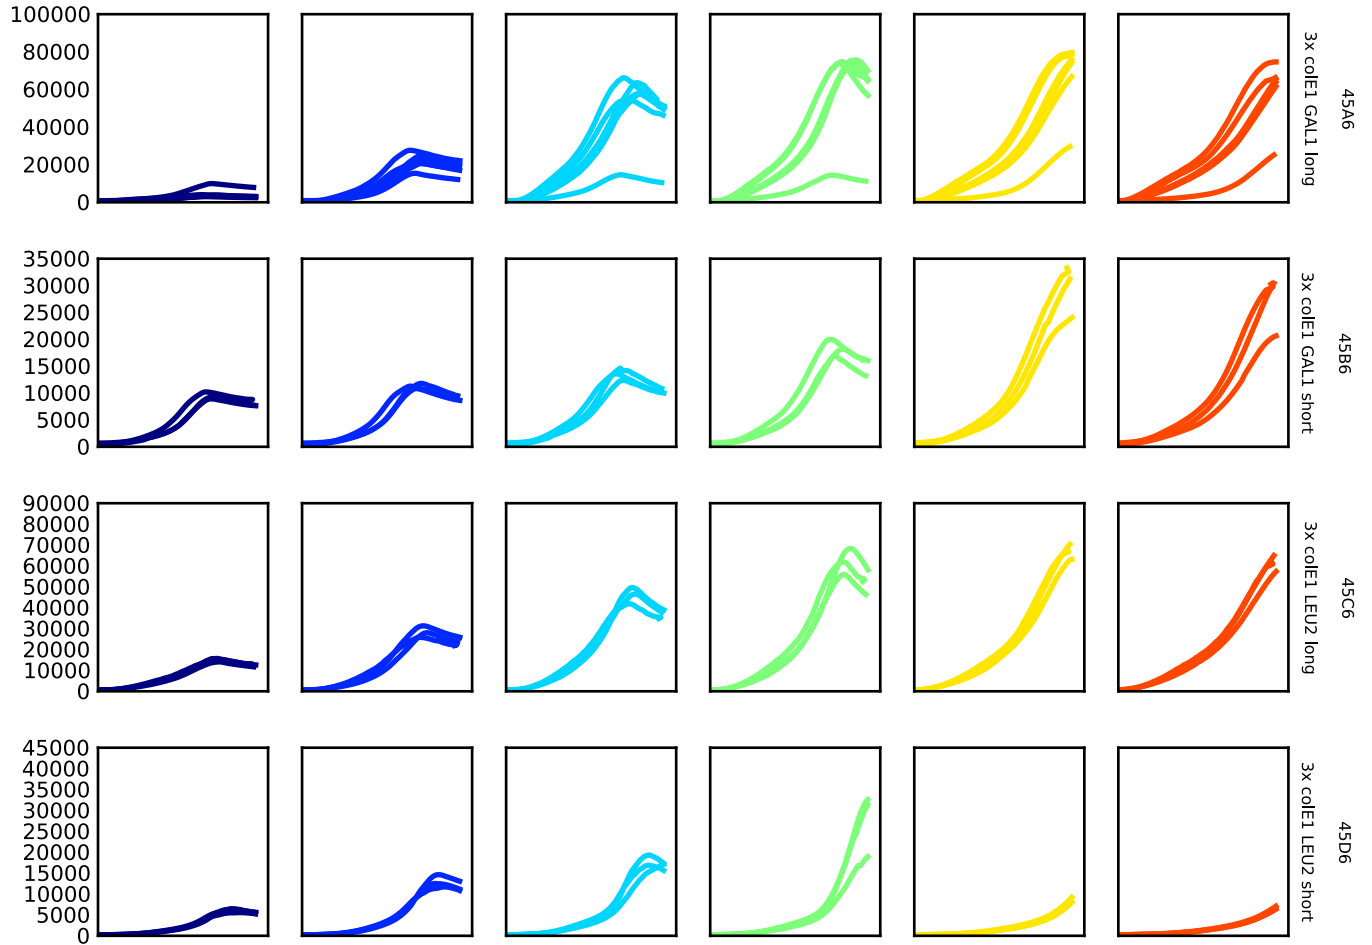

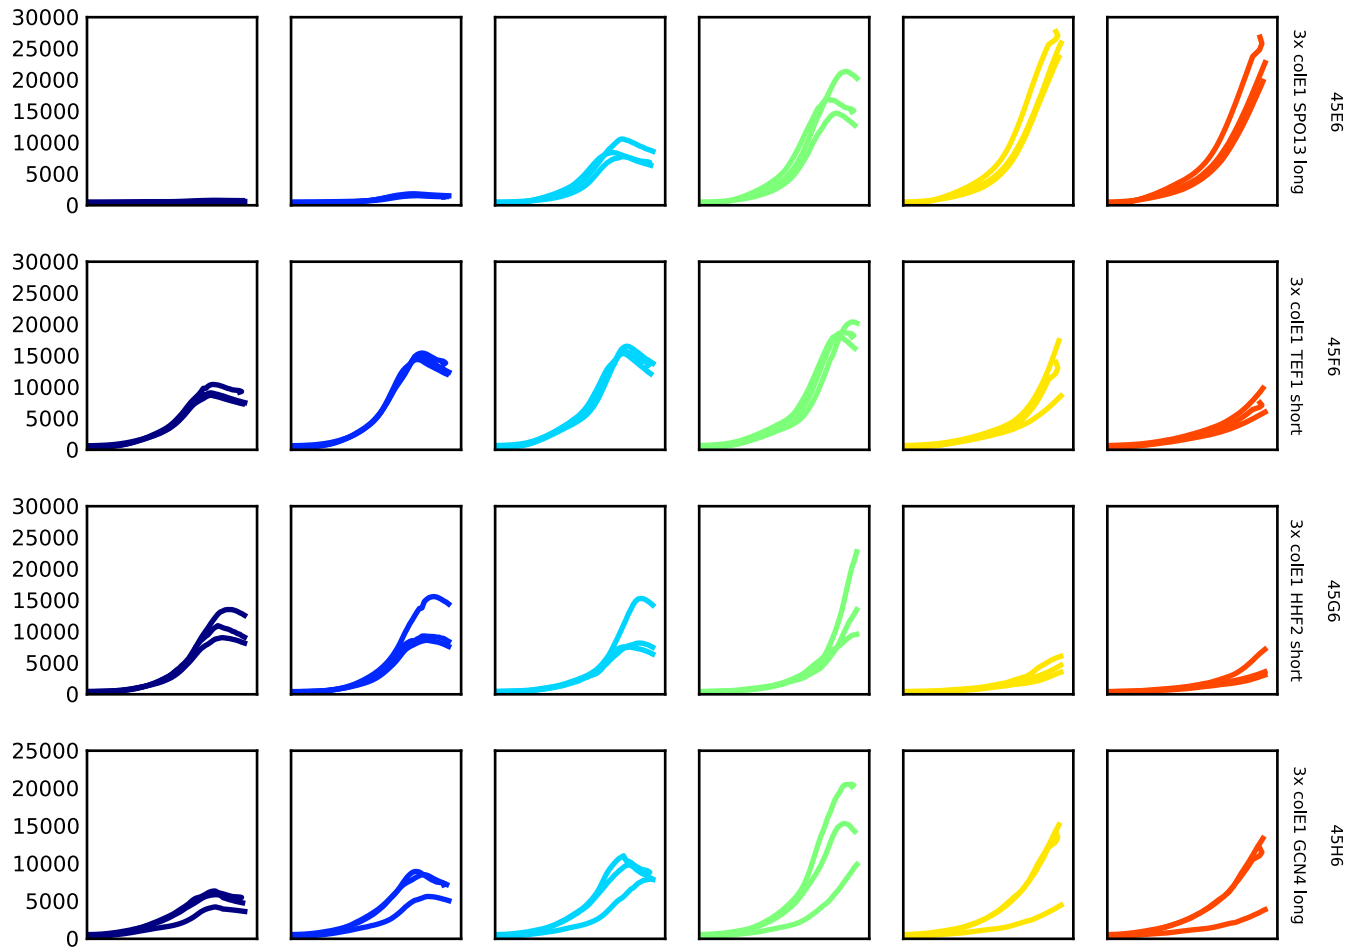

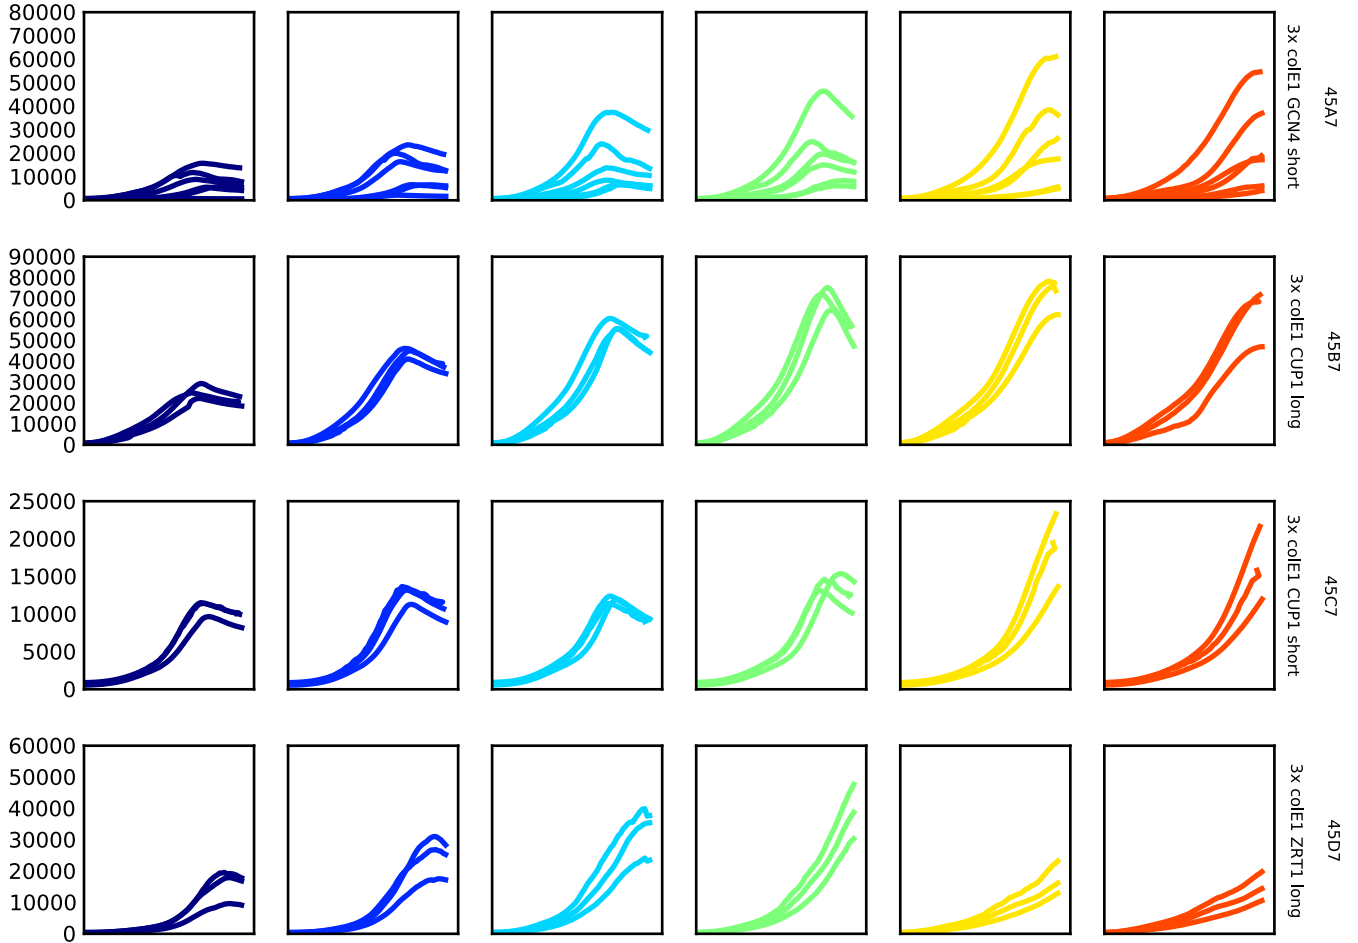

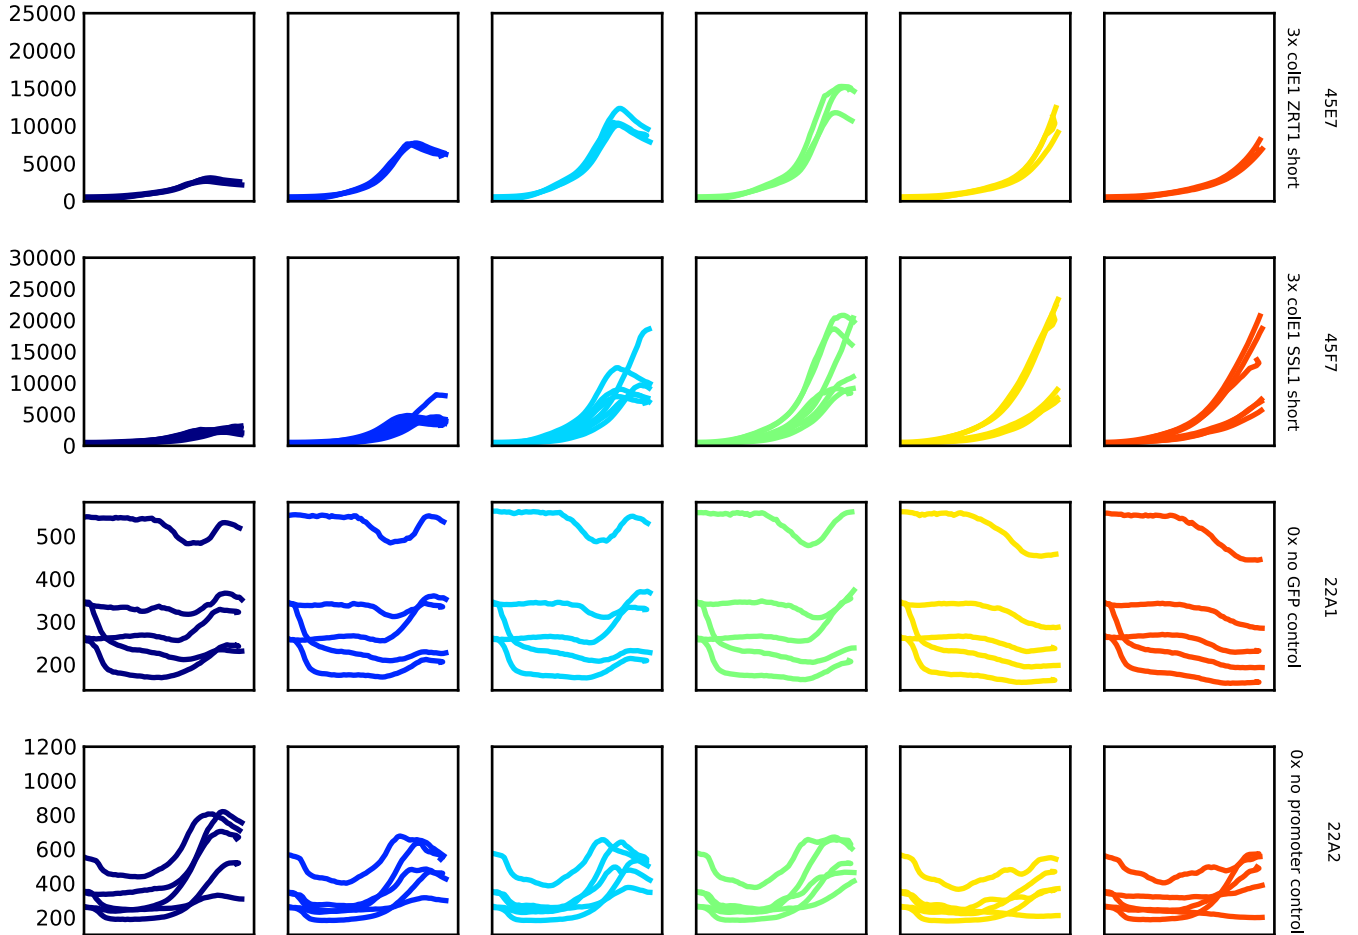

Supplement: YEA-35-273-s003.pdf [file YEA-35-273-s003.pdf]
